# Supplementary material for: Night-time oxidation of surfactants at the air–water interface: effects of chain length, head group and saturation
Source: Copernicus journal article supplement (doi:10.5194/acp-2017-651), 2017-07-27
Supplement: Supplementary file 1 [file acp-2017-651-supplement.pdf]

1 **Electronic Supplementary Information (ESI) for ‘Night-time oxidation of surfactants at**  
2 **the air–water interface: effects of chain length, head group and saturation.’**

3  
4 Federica Sebastiani,<sup>a,b</sup> Richard A. Campbell,<sup>b</sup> Kunal Rastogi<sup>a</sup> and Christian Pfrang.<sup>a\*</sup>

5 <sup>a</sup> Department of Chemistry, University of Reading, P.O. Box 224, RG6 6AD, Reading, UK

6 <sup>b</sup> Institut Laue-Langevin, 71 avenue des Martyrs, CS20156, 38042 Grenoble Cedex 9, France

7 \* corresponding author: c.pfrang@reading.ac.uk

8  
9 **1. Materials and Preliminary Characterisation**

10  
11 **Table 1:** List of the organic surfactants used for the experiments including molecular  
12 weight (MW) and scattering length (SL). \* indicates the custom-deuterated molecules  
13 provided by the Oxford Deuteration Facility.

14  
15

| Molecule                    | Chemical formula                                                                                                     | MW / g mol <sup>-1</sup> | SL / fm |
|-----------------------------|----------------------------------------------------------------------------------------------------------------------|--------------------------|---------|
| <i>d</i> <sub>33</sub> MO*  | CD <sub>3</sub> (CD <sub>2</sub> ) <sub>7</sub> CD=CD(CD <sub>2</sub> ) <sub>7</sub> CO <sub>2</sub> CH <sub>3</sub> | 329.69                   | 346.80  |
| <i>d</i> <sub>34</sub> OA   | CD <sub>3</sub> (CD <sub>2</sub> ) <sub>7</sub> CD=CD(CD <sub>2</sub> ) <sub>7</sub> CO <sub>2</sub> D               | 316.67                   | 358.05  |
| <i>d</i> <sub>14</sub> POA* | CH <sub>3</sub> (CH <sub>2</sub> ) <sub>5</sub> CH=CH(CD <sub>2</sub> ) <sub>7</sub> CO <sub>2</sub> H               | 268.49                   | 151.49  |
| <i>d</i> <sub>35</sub> SA   | CD <sub>3</sub> (CD <sub>2</sub> ) <sub>16</sub> CO <sub>2</sub> H                                                   | 319.69                   | 360.98  |

16  
17  
18  
19  
20

21 The thermodynamic properties of the organic monolayers have been investigated by  
22 measuring the pressure isotherm as a function of the surface area on a Langmuir trough.<sup>1</sup> The  
23 in plane structure of the monolayer was monitored with Brewster angle microscopy (BAM)  
24 imaging while compressing the film to record the isotherm. Those two techniques used in  
25 combination allowed the characterization of the phase behavior of the single component  
26 monolayer, revealing the phase transition regions and the optical properties, such as  
27 anisotropy. OA and MO reach a plateau and they form lenses on top of the isotropic  
28 monolayer, while POA does not reach a clear plateau and the monolayer remains isotropic all  
29 over the compression. The surface pressure reached at the plateau is similar for OA and POA,  
30 while MO reaches a much lower pressure. This suggests a lower chain ordering for MO due  
31 to the poor hydrophilicity of the head group compared to the parent fatty acid, OA. SA shows  
32 in plane structure already at 0 mNm<sup>-1</sup> and further compression leads to solid-like structures.

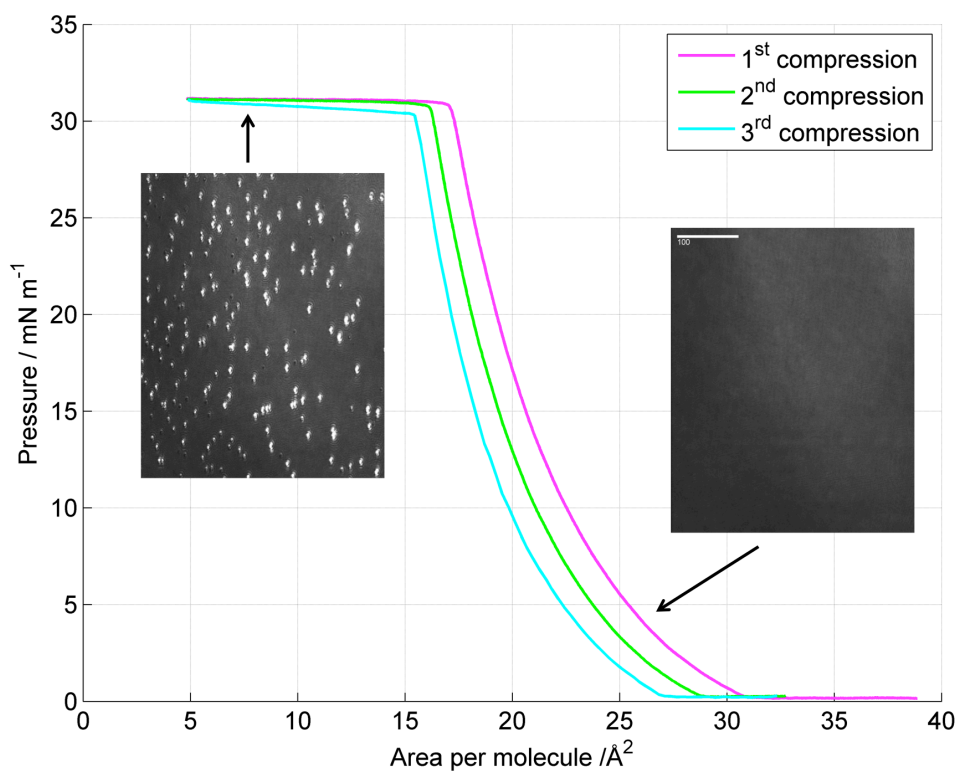

1  
2 **Figure 1.** Surface pressure isotherm of *hMO* at 25 °C on a water subphase with the  
3 corresponding BAM images of the monolayer recorded at two pressures: 3 mN<sup>-1</sup>: the layer  
4 is isotropic; and 16.2 mN<sup>-1</sup>: the layer is collapsed. The white bar corresponds to 100 μm.

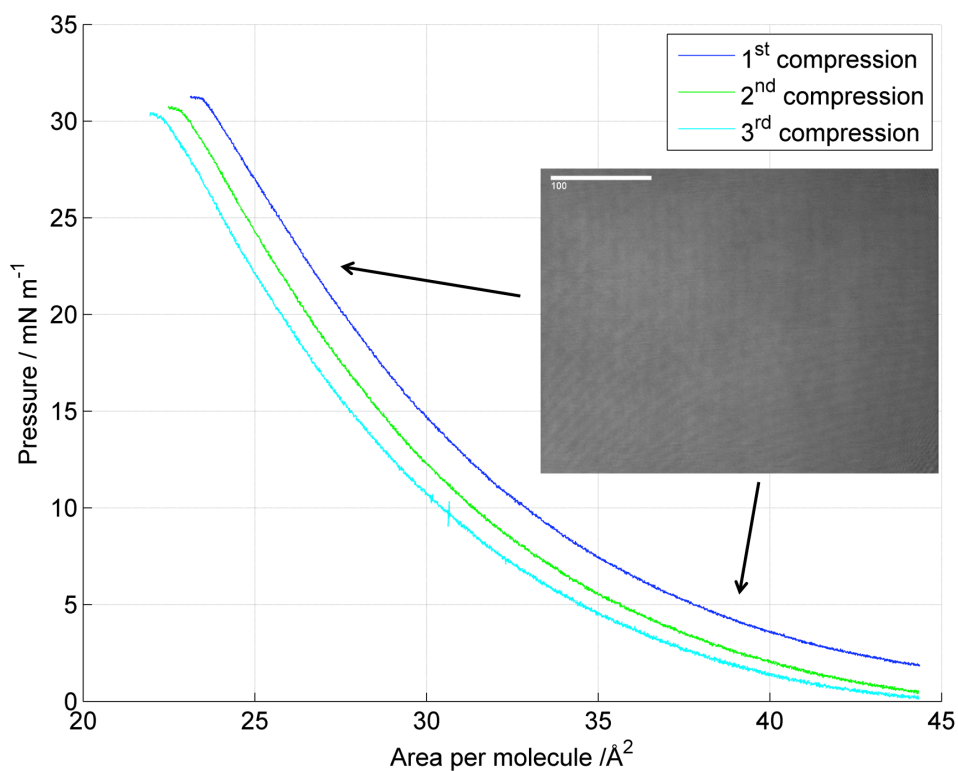

5  
6 **Figure 2.** Surface pressure isotherm of *hPOA* at 25 °C on a water subphase with the  
7 corresponding BAM image recorded at low pressure. The layer is isotropic at all pressures.

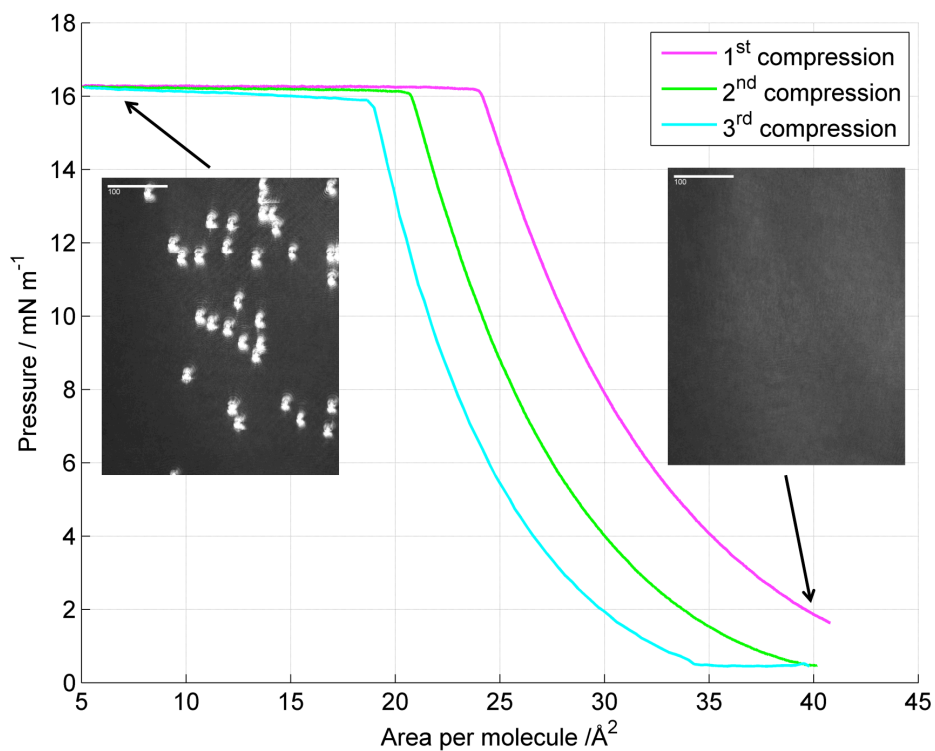

1  
 2 **Figure 3.** Surface pressure isotherm of *hOA* at 25 °C on a water subphase with the  
 3 corresponding BAM images recorded at two pressures: 3 mNm<sup>-1</sup>: the layer is isotropic; and  
 4 32 mNm<sup>-1</sup>: the layer is collapsed. The white bar corresponds to 100 μm.  
 5

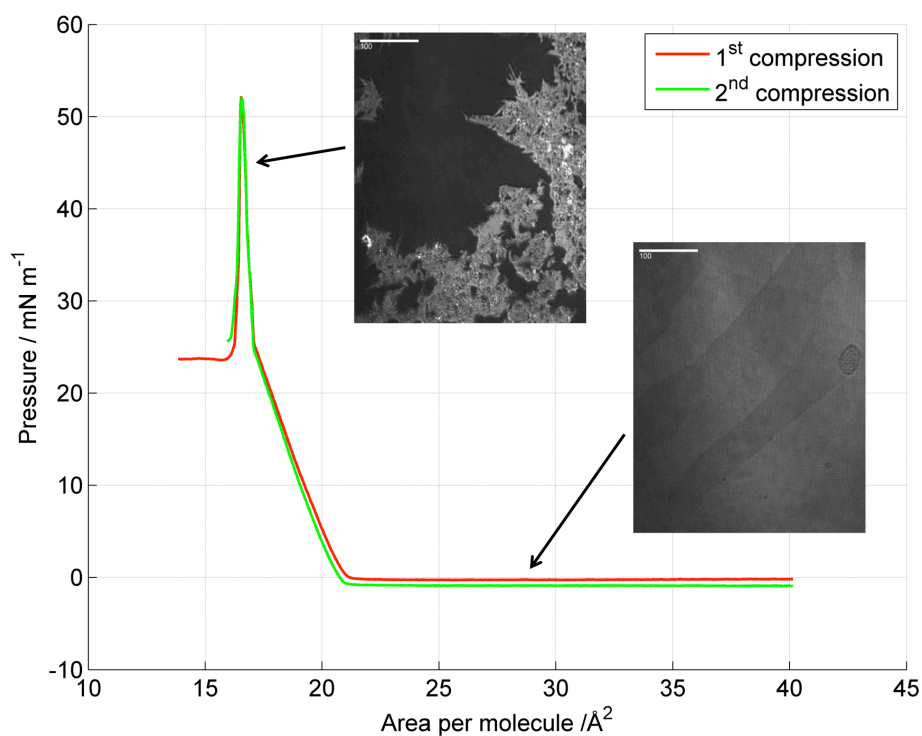

6  
 7 **Figure 4.** Surface pressure isotherm of *hSA* at 25 °C on a water subphase with corresponding  
 8 BAM images recorded at two pressures: 0 mNm<sup>-1</sup>: domains can be distinguished; and 45  
 9 mNm<sup>-1</sup>: organised structures are formed. The white bar corresponds to 100 μm.

1  
2

## 2. Gas Flow System

3 Fig. 5 shows a sketch of the gas flow system. For the production of  $\text{NO}_3$ , the  $\text{O}_2$  flow was  
4 kept at  $1.2 \text{ dm}^3 \text{ min}^{-1}$  and the flow rate of  $\text{NO}_2$  ranged between  $0.06$  to  $0.36 \text{ dm}^3 \text{ cm}^{-1}$ . The  
5 mixing bulb has a volume of  $5 \text{ dm}^3$ , and the inlet part is made of a glass cylinder with 21  
6 small holes on the surface, which enhances mixing of the components. The residence time in  
7 the mixing bulb ranges from 2 to 4 minutes, which is long enough to establish equilibrium  
8 within the products. The concentration of  $\text{NO}_3$  is tuned by changing the  $\text{NO}_2$  flow rate and  
9 hence its concentration.  $[\text{NO}_2]$  is always in large excess of  $[\text{O}_3]$  to ensure that all the ozone is  
10 consumed before the gas flow reaches the organic film.

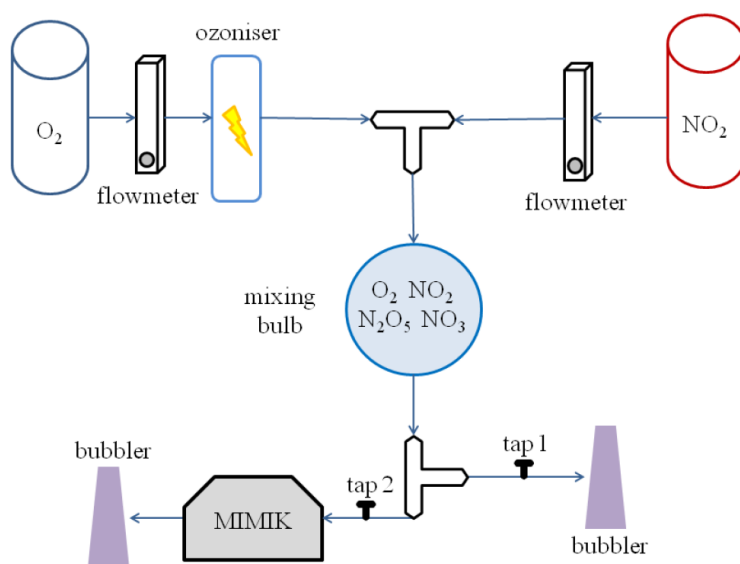

11 **Figure 5.** Schematic of the gas flow system. The arrow represents the direction of the flow.  
12 On the top left side the ozone is produced, then it mixes with  $\text{NO}_2$  just before the inlet of the  
13 mixing bulb. From the mixing bulb the mixture can directly go to an exhaust bubbler or pass  
14 through the reaction chamber.  
15

16  
17 The tubing is made from Chemfluor<sup>®</sup> (PTFE), with an outer diameter of 1/4 inch and an inner  
18 diameter of 1/8 inch; this material has been chosen for its high chemical resistance. A digital  
19 flow meter (Model MV-302, MASS-VIEW, Bronkhorst) has been used for the control of the  
20  $\text{O}_2$  flow. For the  $\text{NO}_2$  a ball flow meter (Cole Parmer) resistant to  $\text{NO}_2$  corrosion has been  
21 used. All the connectors used were made of Teflon or stainless steel to ensure chemical  
22 resistance.

23  
24  
25

### 3. Reaction Model and Spectroscopic Measurements

We produced NO<sub>3</sub> by reacting varying concentrations of NO<sub>2</sub> with a given ozone concentration. [NO<sub>3</sub>] could not be measured directly, but we calculated [NO<sub>3</sub>] from spectroscopic measurements of [NO<sub>2</sub>] and [N<sub>2</sub>O<sub>5</sub>].

#### 3.1 Reaction model

The reactions considered for description of the *in situ* production of NO<sub>3</sub> are shown below:

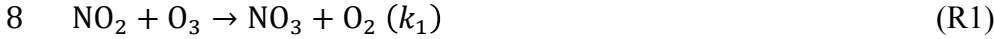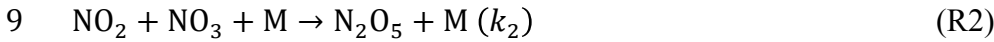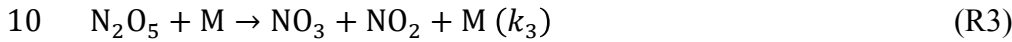

In order to simulate the reactions, the concentrations of the gas-phase species are calculated as a function of time relying on published rate coefficients evaluated in the review "Chemical kinetics and photochemical data for use in atmospheric studies (evaluation No. 17)" by Sander *et al.*<sup>2</sup> (the type of reaction and the ambient conditions, *i.e.* temperature and pressure are appropriately taken into account; the conditions chosen for the calculation are 298.15 K (25 °C) and atmospheric pressure, 1 atm). For further details on the following Eqs 1–7 see Seinfeld and Pandis, 2006.<sup>3</sup> The first reaction is a bimolecular reaction and the rate coefficient is described as:

$$k_1(T) = Ae^{-(E/RT)} \quad (1)$$

$A = 1.2 \times 10^{-13} \text{ cm}^3 \text{ molecule}^{-1} \text{ s}^{-1}$  and  $E/R = 2450 \text{ K}$ ,<sup>2</sup> those values are valid for temperature ranging from 230 to 360 K. Reaction R2 is a termolecular reaction and the rate coefficient,  $k_2(T, [M])$ , is estimated using the expression described by Troe<sup>4</sup>. The concentration of the third body, [M], is related directly to the pressure, in the atmosphere M is the sum of N<sub>2</sub> and O<sub>2</sub> and approximating to ideal gas we can use  $[M] = N_{Av}/V_{mole} = 2.46 \times 10^{19} \text{ molecule cm}^{-3}$ .

$$k_2(T, [M]) = \frac{k_{0,2}(T)[M]}{1+(k_{0,2}(T)[M]/k_{\infty,2}(T))} 0.6 \left[ 1 + (\log(k_{0,2}(T)[M]/k_{\infty,2}(T)))^2 \right]^{-1} \quad (2)$$

where  $k_{0,2}(T)$  is the low-pressure limiting value for  $k_2(T, [M])$  and the dependence on temperature is expressed as:<sup>3,4</sup>

$$k_{0,2}(T) = k_{0,2}^{300} \left( \frac{T}{300} \right)^{-n} \quad (3)$$

1 where  $k_{0,2}^{300} = 2 \times 10^{-30} \text{ cm}^6 \text{ molecule}^{-2} \text{ s}^{-1}$  is the value at 300 K and  $n = 4.4$  (valid for T in the  
 2 range 200 – 300 K), both values were taken from Ref.<sup>2</sup>. The  $k_{\infty,2}(T)$  is the high-pressure limit  
 3 value for  $k_2(T,[M])$  and the dependence on temperature is expressed as:<sup>3,4</sup>

$$4 \quad k_{\infty,2}(T) = k_{\infty,2}^{300} \left( \frac{T}{300} \right)^{-m} \quad (4)$$

5  
 6 where  $k_{\infty,2}^{300} = 1.4 \times 10^{-12} \text{ cm}^3 \text{ molecule}^{-1} \text{ s}^{-1}$  is the value at 300 K and  $m = 0.7$  (valid for  
 7 temperature in the range 200 – 400 K), both values were taken from Sander *et al.*<sup>2</sup>

8 Reaction R3 is similar to the previous one,<sup>4</sup> but the calculation of  $k_{0,3}$  and  $k_{\infty,3}$  is slightly  
 9 different, see Eqs 6 and 7.

$$10 \quad k_3(T, [M]) = \frac{k_{0,3}(T)[M]}{1+(k_{0,3}(T)[M]/k_{\infty,3}(T))} 0.6 \left[ 1 + (\log(k_{0,3}(T)[M]/k_{\infty,3}(T)))^2 \right]^{-1} \quad (5)$$

11  
 12 The low-pressure limit for  $k_3(T,[M])$  is calculated as:

$$13 \quad k_{0,3}(T) = k_{0,3}^{300} \left( \frac{T}{300} \right)^{-p} e^{-L/T} \quad (6)$$

14  
 15 where  $k_{0,3}^{300} = 1.3 \times 10^{-3} \text{ cm}^3 \text{ molecule}^{-1} \text{ s}^{-1}$  is the value at 300 K,  $L = 11000 \text{ K}$  and  $p = 3.5$   
 16 (valid for temperature ranging from 200 to 400 K), all values stated were taken from Sander  
 17 *et al.*<sup>2</sup> The high-pressure limit for  $k_3(T,[M])$  is expressed as:

$$18 \quad k_{\infty,3}(T) = k_{\infty,3}^{300} \left( \frac{T}{300} \right)^q e^{-N/T} \quad (7)$$

19  
 20 where  $k_{\infty,3}^{300} = 9.7 \times 10^{14} \text{ cm}^3 \text{ molecule}^{-1} \text{ s}^{-1}$  is the value at 300 K,  $N = 11080 \text{ K}$  and  $q = 0.1$   
 21 (valid for temperature in the range 200 – 400 K). All the values are taken from Sander *et al.*<sup>2</sup>

22  
 23 **Table 2.** Estimation of the rate constants for the reactions R1 – R3 in the conditions:  $T = 25^\circ\text{C}$   
 24 and pressure 1 atm.

| Rate                    | Value                                                                    |
|-------------------------|--------------------------------------------------------------------------|
| $k_1(298.15 \text{ K})$ | $3.2 \times 10^{-17} \text{ cm}^3 \text{ molecule}^{-1} \text{ s}^{-1}$  |
| $k_2(298.15 \text{ K})$ | $1.18 \times 10^{-12} \text{ cm}^3 \text{ molecule}^{-1} \text{ s}^{-1}$ |
| $k_3(298.15 \text{ K})$ | $0.06 \text{ s}^{-1}$                                                    |

25  
 26  
 27  
 28  
 29  
 30  
 31 Once all the rate coefficients are obtained for the correct conditions (Table 2), the differential  
 32 equations describing the reactions R1 – R3 (Eqs 8 – 11) can be solved numerically in order to  
 33 obtain the concentrations as a function of time for the various chemical compounds.

$$34 \quad \frac{d[\text{O}_3]}{dt} = -k_1[\text{O}_3][\text{NO}_2] \quad (8)$$

$$1 \quad \frac{d[\text{NO}_2]}{dt} = -k_1[\text{O}_3][\text{NO}_2] - k_2[\text{NO}_2][\text{NO}_3] + k_3[\text{N}_2\text{O}_5] \quad (9)$$

$$2 \quad \frac{d[\text{N}_2\text{O}_5]}{dt} = k_2[\text{NO}_2][\text{NO}_3] - k_3[\text{N}_2\text{O}_5] \quad (10)$$

$$3 \quad \frac{d[\text{NO}_3]}{dt} = k_1[\text{O}_3][\text{NO}_2] - k_2[\text{NO}_2][\text{NO}_3] + k_3[\text{N}_2\text{O}_5] \quad (11)$$

4

5 The system of equations has been implemented in Matlab.<sup>5</sup> The solutions have been  
 6 computed for several initial  $[\text{NO}_2]$  values, corresponding to the gas conditions chosen for the  
 7 NR and IR experiments. The initial concentration of ozone was fixed to  $1.05 \times 10^{14}$  molecule  
 8  $\text{cm}^{-3}$ . This value was obtained from the calibration of the ozoniser performed with the UV-  
 9 Vis using a flow rate of  $1.2 \text{ dm}^3 \text{ min}^{-1}$ .

10 Figs 6–9 show the concentrations of the various gas species as a function of time and their  
 11 dependence on the initial  $\text{NO}_2$  concentrations.

12

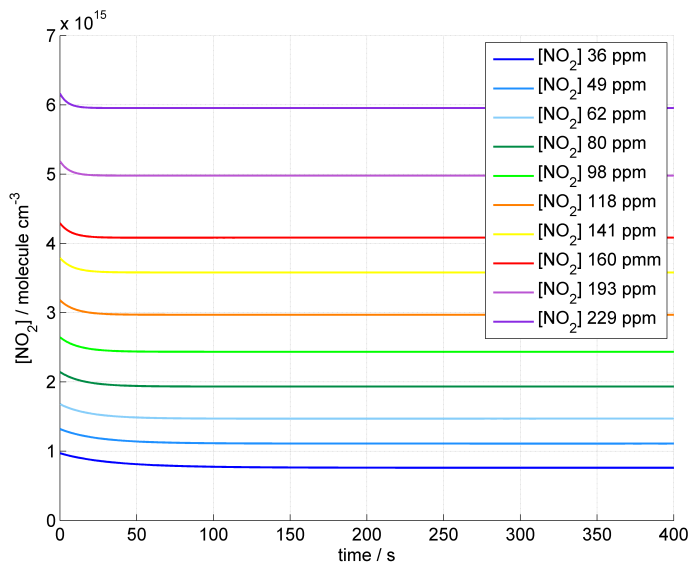

13

14 **Figure 6.** Time evolution of  $[\text{NO}_2]$  calculated from Eqs 8–11 for several initial values of  
 15  $[\text{NO}_2]$ . The initial values of  $[\text{NO}_2]$  are reported in the legend.

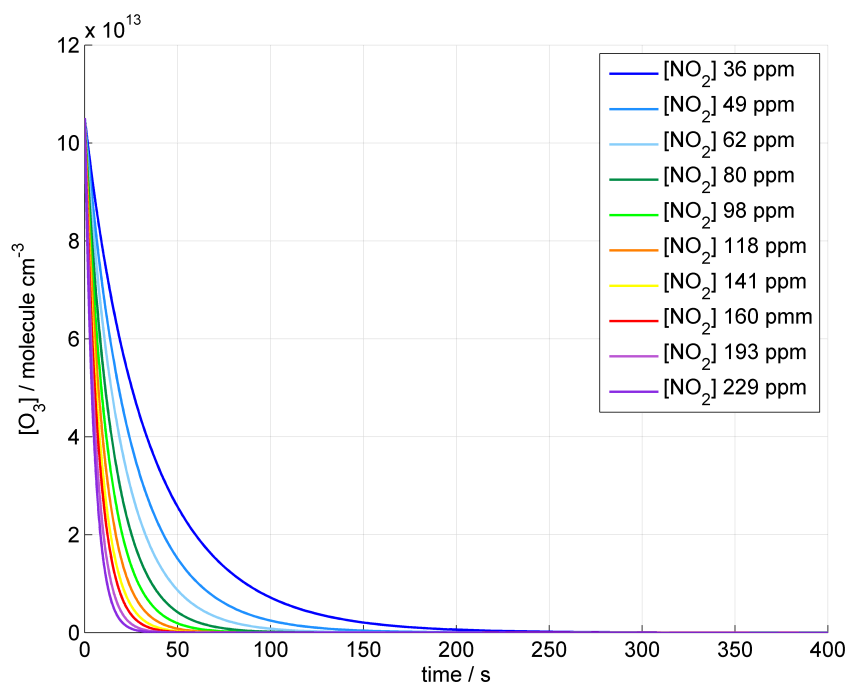

1  
2 **Figure 7.** The consumption of  $O_3$  as a function of  $t$ , calculated from Eqs 8–11 as a function of  
3 different initial  $[NO_2]$  values is displayed.  
4

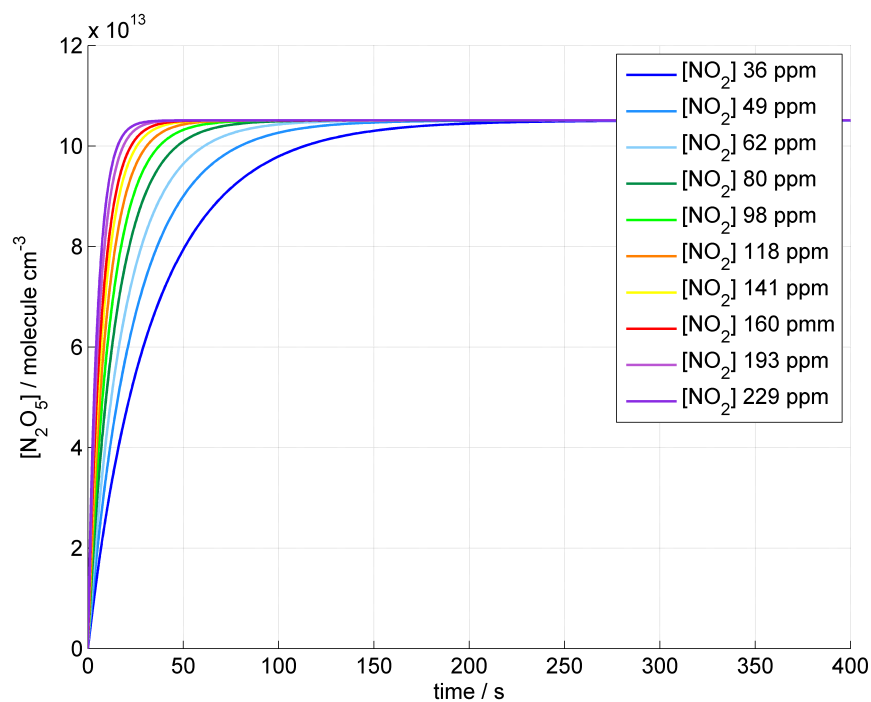

5  
6 **Figure 8.** The formation of  $[N_2O_5]$  as a function of  $t$ , calculated from Eqs 8–11 for several  
7 initial values of  $[NO_2]$  is shown.  
8



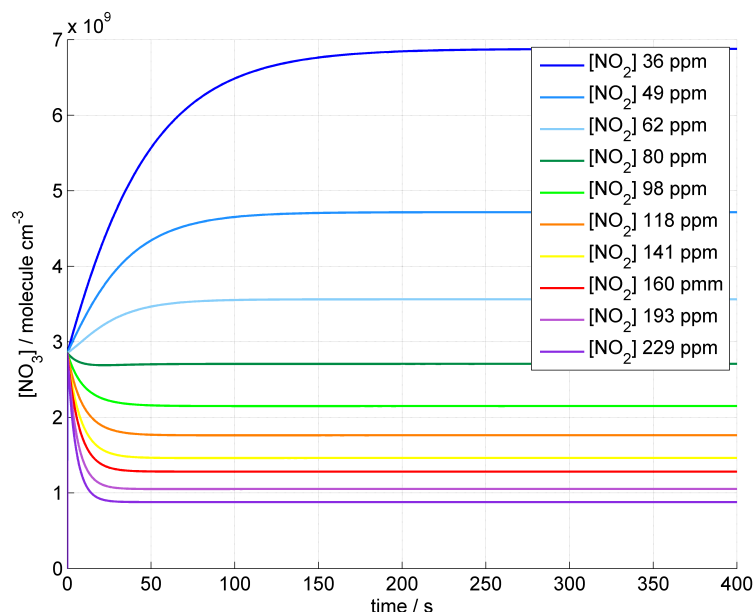

**Figure 9.** The formation of  $[\text{NO}_3]$  as a function of  $t$ , calculated from Eqs 8–11 for several initial values of  $[\text{NO}_2]$  is shown.

Since the concentrations reach constant values quickly, the data are reported just for  $t \leq 400$  s.  $\text{NO}_2$  reaches the steady state concentration faster when the initial  $[\text{NO}_2]$  is higher. Ozone is totally consumed in less than 250 s (see Fig. 7). The concentration of  $\text{NO}_3$  produced ranges from 36 ppt to 279 ppt, and it is lower when the excess of  $\text{NO}_2$  is higher (see Fig. 9). The steady state concentrations of  $\text{N}_2\text{O}_5$  are always approaching the same value (Fig. 8) that is determined by the initial ozone concentration.

In the experimental gas-setup a  $5 \text{ dm}^3$  mixing bulb was used to allow the reaching of steady-state concentrations of the gas species before they entered the reaction chamber. In the NR measurements conducted at the Institut Laue-Langevin (Grenoble, France), the reaction chamber was situated in a temperature-controlled sample area while the mixing bulb was situated simply in the guide hall where the temperature was not well controlled.

An additional study of the gas system focused on the temperature dependence of the steady state concentrations to establish the impact of warm weather during the NR measurements. The rate constants ( $k_1$ ,  $k_2$  and  $k_3$ ) were estimated for several temperature values and used for solving the differential Eqs 8–11. The purpose was to estimate specifically the time needed to reach a new steady state concentration due to the change in temperature between the mixing bulb in the guide hall and the reaction chamber in the sample area. For example, to calculate the steady state concentrations at  $T = 30 \text{ }^\circ\text{C}$  the values calculated at  $T = 25 \text{ }^\circ\text{C}$  were used as initial conditions for the differential equations and the solutions were computed. Fig. 10 show

1 the evolution of concentrations due to temperature increase (initial  $[\text{NO}_2] = 36 \text{ ppm}$ ). It is  
 2 apparent that only a few tens of milliseconds are enough to reach the new constant  
 3 concentrations. (Note that the computed values for  $\text{O}_3$  are meaningless since they are virtually  
 4 zero;  $\approx 10^{-31} \text{ molecule cm}^{-3}$ .) Evidence of this rapid establishment of equilibrium conditions  
 5 following a temperature change is essential information in the interpretation of the  
 6 experimental data recorded with NR.

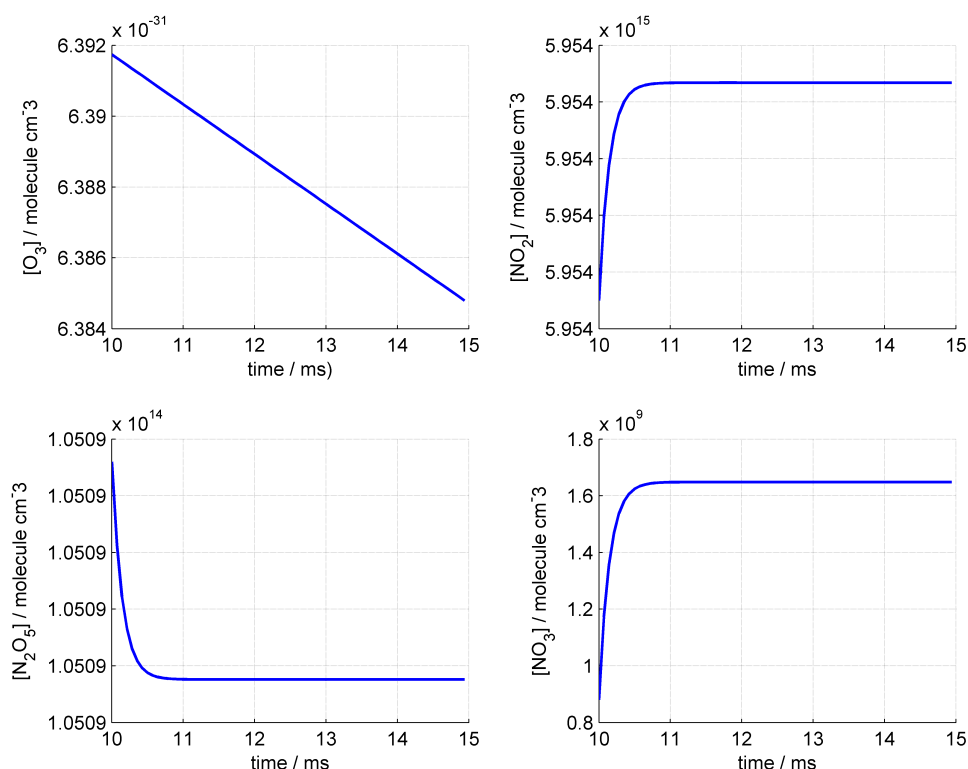

7  
 8 **Figure 10.** The evolution of the concentrations of  $\text{O}_3$ ,  $\text{NO}_2$ ,  $\text{N}_2\text{O}_5$  and  $\text{NO}_3$  due to temperature  
 9 increase from  $25 \text{ }^\circ\text{C}$  to  $30 \text{ }^\circ\text{C}$  (the initial concentration of  $\text{NO}_2$  is  $36 \text{ ppm}$ ). The equilibrium is  
 10 reached in tens of milliseconds.

11  
 12 The development of this model provides the means to calculate the  $\text{NO}_3$  concentration from  
 13 the concentrations of  $\text{NO}_2$  and  $\text{N}_2\text{O}_5$ . Those concentrations may be measured by IR  
 14 spectroscopy. Once the reactions R1 – R3 achieve the steady states the measured values for  
 15  $[\text{NO}_2]$  and  $[\text{N}_2\text{O}_5]$  allow calculation of the  $[\text{NO}_3]$  using the following equation:

16 
$$\frac{d[\text{NO}_3]}{dt} = 0 \Rightarrow [\text{NO}_3] = \frac{k_1[\text{O}_3][\text{NO}_2] + k_3[\text{N}_2\text{O}_5]}{k_2[\text{NO}_2]} \quad (12)$$

17 
$$t \geq 400 \text{ s}, [\text{O}_3] \rightarrow 0, [\text{NO}_3] \cong \frac{k_3[\text{N}_2\text{O}_5]}{k_2[\text{NO}_2]} \quad (13)$$

18  
 19  
 20

### 1 3.2 IR measurements

2 The measurements of the concentrations have been performed with an FTIR spectrometer  
3 (IFS/66 S, Bruker). For the very low concentrations to be detected, the most sensitive detector  
4 of the FTIR spectrometer was chosen which was a photoconductive detector (MCT D315).  
5 The acquired spectrum was averaged over 100 scans and the resolution was fixed to  $1 \text{ cm}^{-1}$ . A  
6 systematic study of the gas mixture composition as a function of  $[\text{NO}_2]$  was performed.  $[\text{NO}_2]$   
7 in the cylinder was 1000 ppm in air, to obtain various concentrations the flow rate of  $\text{NO}_2$  was  
8 varied from  $45 \text{ cm}^3 \text{ min}^{-1}$  to  $360 \text{ cm}^3 \text{ min}^{-1}$  and mixed with the carrier gas (oxygen) flowing  
9 at  $1.2 \text{ dm}^3 \text{ min}^{-1}$  (the resulting concentrations are reported in Table 3).

10  
11 **Table 3.** The flow rates of  $\text{NO}_2$  are reported in the first column. The resulting concentrations  
12 due to mixing with  $\text{O}_2$  flowing at  $1.2 \text{ dm}^3 \text{ min}^{-1}$  are reported in the second column.

13  
14

| $\text{NO}_2$ flow rate / $\text{cm}^3 \text{ min}^{-1}$ | $[\text{NO}_2]$ / ppm |
|----------------------------------------------------------|-----------------------|
| 45                                                       | 36                    |
| 62                                                       | 49                    |
| 80                                                       | 62                    |
| 104                                                      | 80                    |
| 130                                                      | 98                    |
| 161                                                      | 118                   |
| 197                                                      | 141                   |
| 228                                                      | 160                   |
| 290                                                      | 193                   |
| 360                                                      | 229                   |

15  
16  
17  
18  
19  
20  
21  
22  
23  
24  
25

26 The  $\text{O}_3$  concentration was kept constant at  $1.05 \times 10^{14} \text{ molecule cm}^{-3}$  by setting the oxygen  
27 flow to  $1.2 \text{ dm}^3 \text{ min}^{-1}$  and the ozoniser exposure to 10 intervals, i.e. maximum UV exposure.

28 Two types of measurements were recorded. First, in order to calculate the absorption cross  
29 section for  $\text{NO}_2$ , the mixture of  $\text{O}_2$  and  $\text{NO}_2$  was measured without  $\text{O}_3$  production for each  
30 flow rate. Secondly, the spectra of the mixture produced by the reactions R1 – R3 were  
31 measured in order to record the  $\text{NO}_2$  loss and the  $\text{N}_2\text{O}_5$  production. For each  $\text{NO}_2$  flow  
32 condition, at least two independent experiments were performed, in order to account for errors  
33 due to not ideal reproducibility of the experimental procedures, e.g. flow meter settings. The  
34 gas sampling chamber was a glass cylinder with a path length of 18 cm, and two circular  $\text{CaF}_2$   
35 windows of a diameter of 2.5 cm. The chamber inlet was connected to the exit of the  $5 \text{ dm}^3$   
36 mixing bulb. The outlet was connected to a bubbler. For the connections Teflon tubing and  
37 either Teflon or stainless steel gas connectors were used. The flow was admitted to the  
38 chamber for 10 minutes, then the chamber taps were closed and the chamber was  
39 disconnected from the gas flow system. Immediately after, the chamber was placed in the

1 sample area of the spectrometer and the measurements were recorded. Once the NO<sub>2</sub>-O<sub>2</sub>  
2 mixture was measured, the glass chamber was connected again to the gas flow system and the  
3 O<sub>2</sub> was exposed to UV light, after 10 min, the glass chamber filled with the mixture NO<sub>2</sub>-O<sub>2</sub>-  
4 N<sub>2</sub>O<sub>5</sub> was again put into the IR measurement area and the data were acquired. Background  
5 measurements were recorded with the chamber filled with pure oxygen.

6 The spectral contribution of the atmospheric gases, H<sub>2</sub>O and CO<sub>2</sub>, was eliminated with the  
7 atmospheric compensation routine of the FTIR instrument software. The treatment of the data  
8 has been performed with the software provided with the instrument (OPUS 5.5, Bruker). In  
9 order to obtain the absorbance due to the investigated gas species the absorbance spectrum  
10 recorded for pure oxygen was subtracted from the spectra of the mixture, then a baseline  
11 correction was performed fitting a polynomial function to the spectrum excluding the peaks.  
12 Examples of absorbance spectra is reported in Fig. 11. The spectra recorded for NO<sub>2</sub>-O<sub>2</sub> are  
13 compared to the spectra of NO<sub>2</sub>-O<sub>2</sub>-N<sub>2</sub>O<sub>5</sub> with the same initial [NO<sub>2</sub>]. The characteristic peaks  
14 of NO<sub>2</sub> used in this study were centred at  $\approx 1600\text{ cm}^{-1}$  and  $\approx 1628\text{ cm}^{-1}$ .<sup>6</sup> A clear decrease of  
15 absorbance accounts for the NO<sub>2</sub> consumption due to the reactions R1 – R2. The appearance  
16 of three peaks in the spectra of NO<sub>2</sub>-O<sub>2</sub>-N<sub>2</sub>O<sub>5</sub> can be attributed to N<sub>2</sub>O<sub>5</sub> and HNO<sub>3</sub>. The  
17 characteristic peaks used for N<sub>2</sub>O<sub>5</sub> are near  $1250\text{ cm}^{-1}$  and  $1700\text{ cm}^{-1}$ .<sup>7</sup> HNO<sub>3</sub> absorbs close to  
18  $1320\text{ cm}^{-1}$  and  $1710\text{ cm}^{-1}$ .<sup>8,9</sup> Initially, we did not expect to measure HNO<sub>3</sub>, since the gas flow  
19 system was considered to be in dry conditions. The spectra show clearly the presence of  
20 HNO<sub>3</sub>, which can be attributed to the reaction between N<sub>2</sub>O<sub>5</sub> and water. For this reason, the  
21 peak at  $1700\text{ cm}^{-1}$  has not been used to quantify N<sub>2</sub>O<sub>5</sub>, because it overlapped with the peak  
22 due to nitric acid. The absorbance intensity at  $1250\text{ cm}^{-1}$  was used to obtain [N<sub>2</sub>O<sub>5</sub>] with an  
23 absorption cross section of  $1.81 \times 10^{-18}\text{ cm}^2\text{ molecule}^{-1}$ .<sup>7</sup>

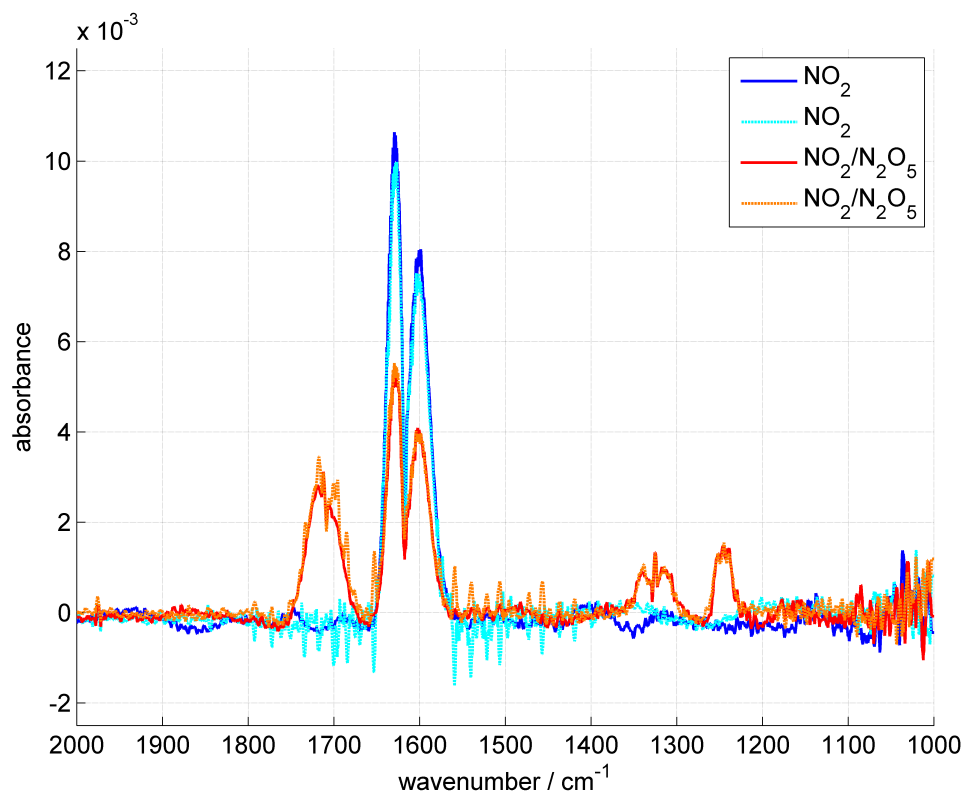

1  
2 **Figure 11.** Absorbance spectra recorded with FTIR spectroscopy. The concentration  
3 of  $\text{NO}_2$  was 36 ppm. The blue solid line and the light blue dashed line represents the  
4 spectra recorded for  $\text{NO}_2$  carried by  $\text{O}_2$ . The red solid line and the orange dashed line  
5 refer to the spectra recorded for the mixture of  $\text{NO}_2 - \text{N}_2\text{O}_5$  produced by the reactions  
6 R1 – R3 and carried by  $\text{O}_2$ . The background and baseline subtractions have been  
7 performed using the OPUS software.

8  
9 As found with the theoretical calculation, the concentration of  $\text{N}_2\text{O}_5$  is not varying as a  
10 function of the  $\text{NO}_2$  initial concentration. The value obtained is about half of what the model  
11 predicted. Since the ozone production is fairly stable and reproducible, we suggest that this  
12 reduced  $\text{N}_2\text{O}_5$  can be explained by the heterogeneous reaction of  $\text{N}_2\text{O}_5$  with water, which is  
13 rapid compared to the gas-phase reaction<sup>3</sup> and we found clear spectroscopic evidence of the  
14 presence of  $\text{HNO}_3$ .

15 In order to calculate the  $\text{NO}_3$  concentration,  $[\text{NO}_2]$  is needed. To the best of our knowledge,  
16 the absorption cross section for  $\text{NO}_2$ ,  $\epsilon_{\text{NO}_2}$ , in the IR region is not available, hence we decided  
17 to measure this coefficient using the mixture  $\text{NO}_2\text{-O}_2$  and then use  $\epsilon_{\text{NO}_2}$  to quantify the  
18 concentration of  $\text{NO}_2$  after reaction. The actual concentration was derived taking into account  
19 the nominal concentration of the  $\text{NO}_2$  cylinder (1000 ppm) and the  $\text{NO}_2$  flow rate. Figures 12  
20 and 13 show the absorbance peak intensities, with and without  $\text{O}_3$  reaction, as a function of  
21 the initial  $\text{NO}_2$  concentration.

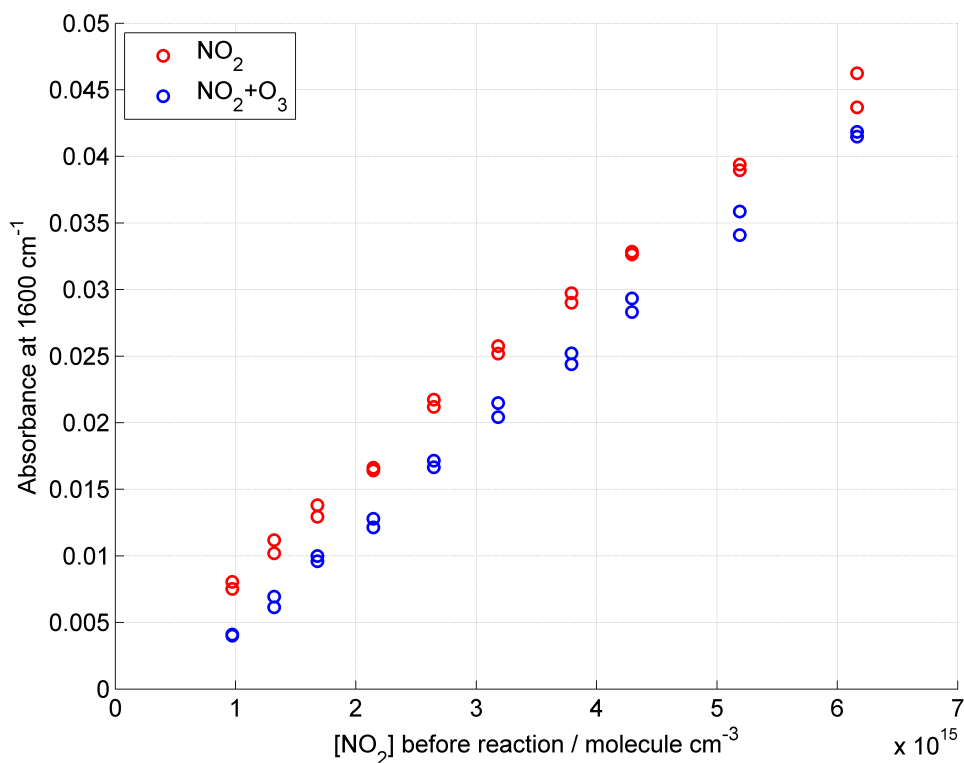

1  
2 **Figure 12.** Intensity of the absorbance peak around 1600 cm<sup>-1</sup> as a function of the  
3 initial [NO<sub>2</sub>]. Blue circles represent NO<sub>2</sub> mixed with O<sub>3</sub>, red circles represent the NO<sub>2</sub>  
4 not exposed to O<sub>3</sub>.

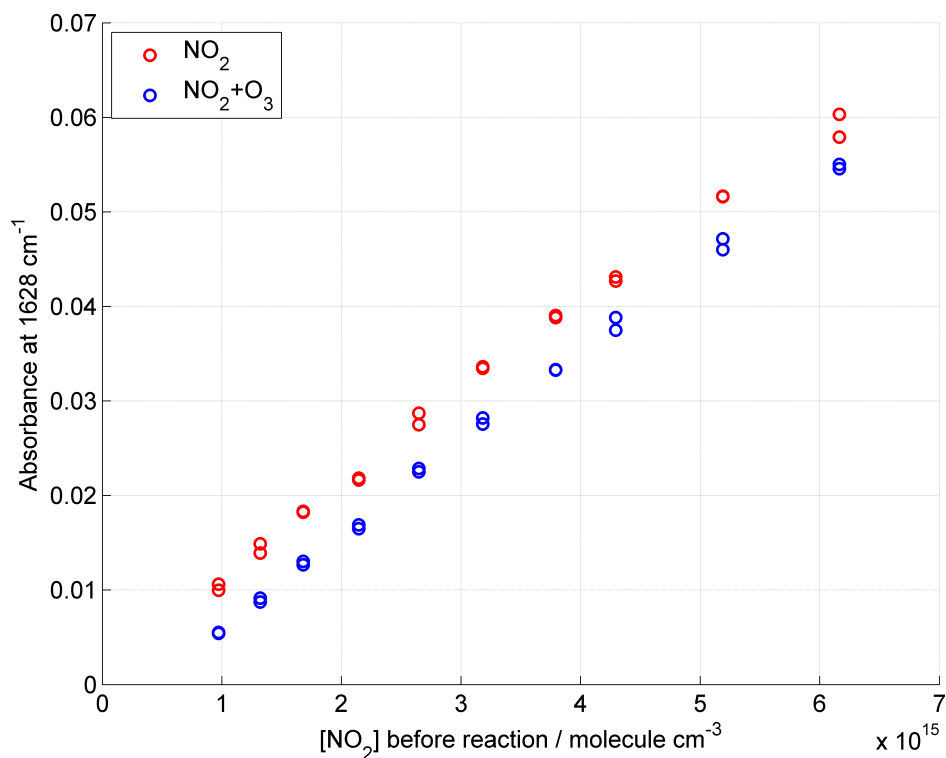

5  
6 **Figure 13.** Intensity of the absorbance peak around 1628 cm<sup>-1</sup> as a function of the  
7 initial [NO<sub>2</sub>]. Blue circles represent NO<sub>2</sub> mixed with O<sub>3</sub>, red circles represent the NO<sub>2</sub>  
8 not exposed to O<sub>3</sub>.

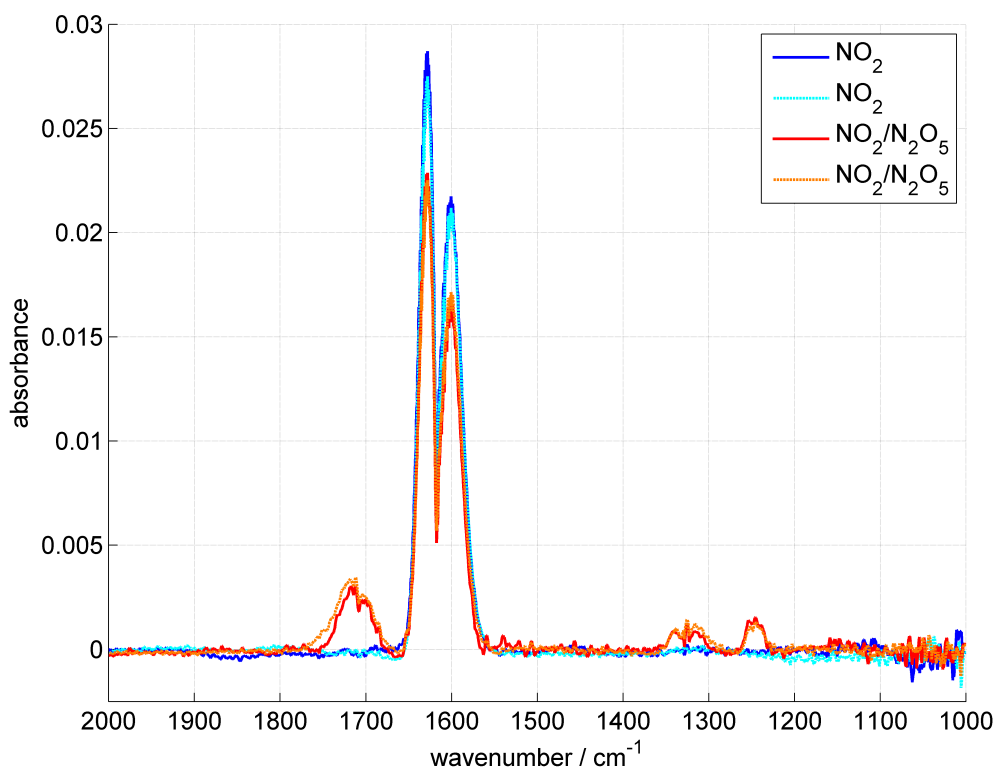

1  
 2 **Figure 14.** Absorbance spectra recorded with FTIR spectroscopy. The concentration  
 3 of NO<sub>2</sub> was 98 ppm. The blue solid line and the light blue dashed line represents the  
 4 spectra recorded for NO<sub>2</sub> carried by O<sub>2</sub>. The red solid line and the orange dashed line  
 5 refer to the spectra recorded for the mixture of NO<sub>2</sub> – N<sub>2</sub>O<sub>5</sub> produced by the reactions  
 6 R1 – R3 and carried by O<sub>2</sub>. The background and baseline subtractions have been  
 7 performed using the OPUS software.  
 8

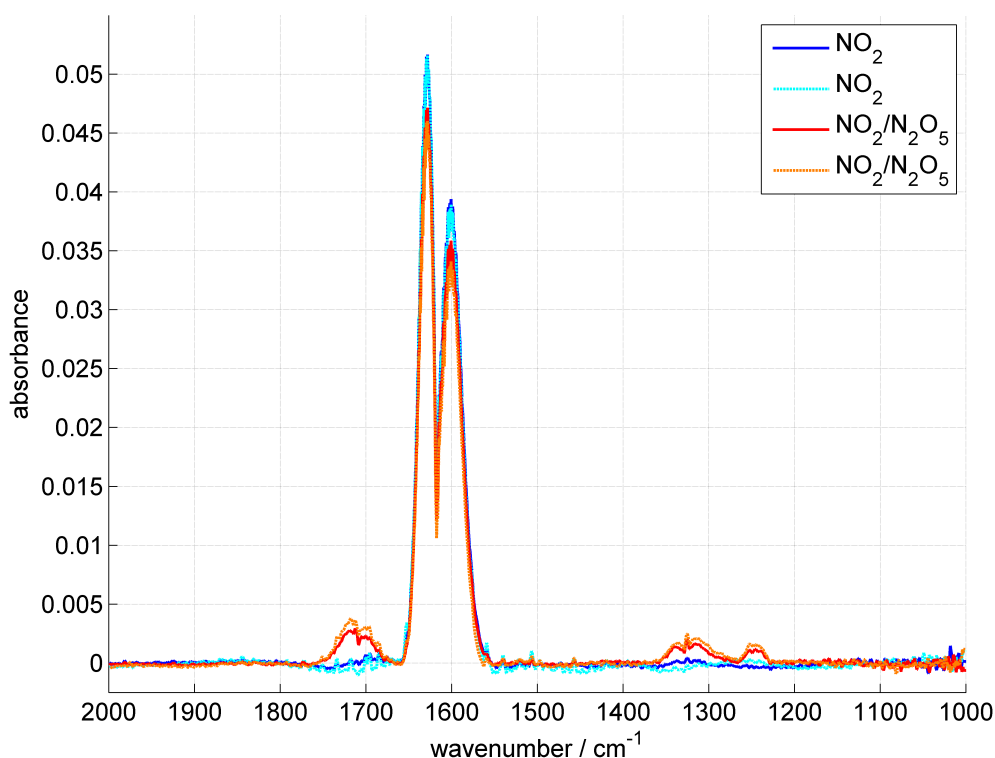

1  
2 **Figure 15.** Absorbance spectra recorded with FTIR spectroscopy. The concentration  
3 of NO<sub>2</sub> was 193 ppm. The blue solid line and the light blue dashed line represents the  
4 spectra recorded for NO<sub>2</sub> carried by O<sub>2</sub>. The red solid line and the orange dashed line  
5 refer to the spectra recorded for the mixture of NO<sub>2</sub> – N<sub>2</sub>O<sub>5</sub> produced by the reactions  
6 R1 – R3 and carried by O<sub>2</sub>. The background and baseline subtractions have been  
7 performed using the OPUS software.

8  
9 The absorbance intensity increases linearly with concentration for both peaks and  $\epsilon_{\text{NO}_2}$  can be  
10 calculated from the red data set. The values obtained from the linear fit to those data are:  $\epsilon_{\text{NO}_2}$   
11 ( $1600 \text{ cm}^{-1}$ ) =  $(4.22 \pm 0.04) \times 10^{-19} \text{ cm}^2 \text{ molecule}^{-1}$  for the peak near  $1600 \text{ cm}^{-1}$  and  $\epsilon_{\text{NO}_2}$   
12 ( $1628 \text{ cm}^{-1}$ ) =  $(5.57 \pm 0.05) \times 10^{-19} \text{ cm}^2 \text{ molecule}^{-1}$  for the peak near  $1628 \text{ cm}^{-1}$ .

13 The concentration of NO<sub>2</sub> after the reaction with ozone has been calculated using the two  
14 absorption cross sections,  $\epsilon_{\text{NO}_2}(1600 \text{ cm}^{-1})$  and  $\epsilon_{\text{NO}_2}(1628 \text{ cm}^{-1})$ . The loss of NO<sub>2</sub> is almost  
15 constant as a function of the initial concentration. The NO<sub>2</sub> loss measured is about four times  
16 the initial O<sub>3</sub> concentration, hence it is double of the value expected from the model ( $\approx 2.1 \times$   
17  $10^{14} \text{ molecule cm}^{-3}$ ). In the model the equilibrium between NO<sub>2</sub> and N<sub>2</sub>O<sub>4</sub> was not  
18 considered, and hence this may account for the extra loss of NO<sub>2</sub> recorded.

19 Furthermore, other minor reactions were not taken into account in the model, such as the NO<sub>2</sub>  
20 photolysis and the heterogeneous reaction on NO<sub>2</sub> with liquid water.<sup>10</sup>

21 Even if other reactions were found to affect the final concentrations of NO<sub>2</sub> and N<sub>2</sub>O<sub>5</sub>, the  
22 amount of NO<sub>3</sub> produced is determined by the reactions R2 – R3, which control the



1 equilibrium within the  $\text{NO}_2\text{-N}_2\text{O}_5\text{-NO}_3$  system, hence  $[\text{NO}_3]$  can be calculated using Equation  
 2 13. The concentration of  $\text{NO}_3$  is shown in Fig. 16 as a function of the initial  $[\text{NO}_2]$ .  $[\text{NO}_3]$   
 3 ranges from 13 ppt to 160 ppt, which is representative for atmospheric conditions.<sup>11</sup> Any loss  
 4 of  $\text{NO}_3$  due to reactions different from the recombination with  $\text{NO}_2$  are not taken into account  
 5 for the calculation.

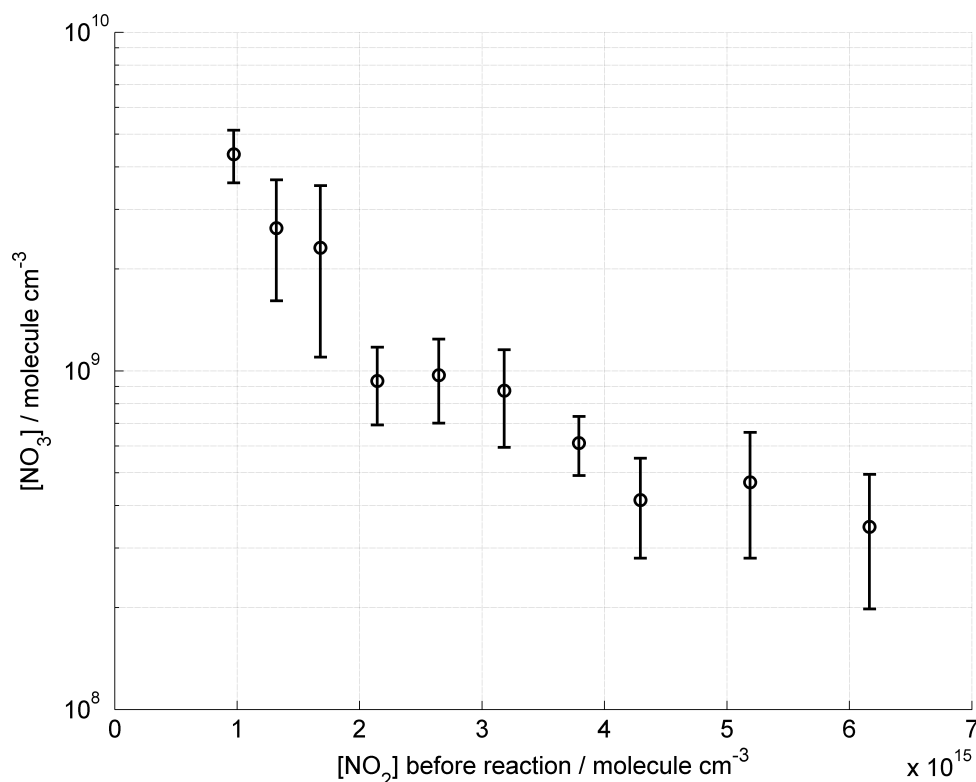

6  
 7 **Figure 16.** The concentration of  $\text{NO}_3$  produced in reactions R1 – R3 and calculated  
 8 from Eq. 12 is shown as a function of the initial concentration of  $\text{NO}_2$ . As expected,  
 9 the  $\text{NO}_3$  production decreases as  $[\text{NO}_2]$  increases.

#### 10 4. Kinetic Modelling: Model Description and Fitting Procedures

##### 11 4.1 Model description: gas species

12 In this section the description of the kinetic model is completed with all the details about the  
 13 processes involving the gas species: adsorption, desorption, transport and reaction.

14 From the kinetic theory, the flux of colliding  $X_i$  molecules with the surface can be expressed  
 15 as

$$17 J_{\text{coll},X_i} = \frac{\omega_{X_i}}{4} [X_i]_{gs} \quad (14)$$

18 where  $[X_i]_{gs}$  is the near-surface gas concentration that is assumed to be the same as the gas  
 19 phase concentration. As a result of the finite time required to fill the chamber, the gas-phase  
 20 concentration in the chamber is described as  $[X_i]_{gs} = [X_i]_v(1 - e^{-(f/v)t})$ , where  $f$  is the flow

1 rate,  $v$  is the volume of the chamber and  $[X_i]_v$  is the oxidant concentration measured by IR  
 2 spectroscopy (see Section 3 for details).  $\omega_{NO_3}$  is the mean thermal velocity given by  
 3  $\omega_{X_i} = \sqrt{8RT/\pi M_{X_i}}$ , where  $M_{X_i}$  is the molar mass of  $X_i$ ,  $R$  is the gas constant and  $T$  is the  
 4 absolute temperature. The flux of gas molecules adsorbed on the organic layer is expressed by

$$5 \quad J_{ads,X_i} = \alpha_{s,X_i} J_{coll,X_i} \quad (15)$$

6

7 where  $\alpha_{s,X_i}$  is the surface accommodation coefficient. In the Langmuir adsorption model,  $\alpha_{s,X_i}$   
 8 is determined by the product of the surface accommodation coefficient on an adsorbate-free  
 9 surface,  $\alpha_{s,0,X_i}$ , and the sorption layer coverage  $\theta_s$  which is given by the sum of the surface  
 10 coverage of all competing adsorbate species (*i.e.*  $NO_3$  and  $NO_2$ ).

11

$$12 \quad \alpha_{s,X_i} = \alpha_{s,0,X_i} (1 - \sum_i \theta_{s,X_i}) = \alpha_{s,0,X_i} (1 - \sum_i \sigma_{X_i} [X_i]_s) \quad (16)$$

13 The surface coverage is defined as the ratio between the actual and the maximum surface  
 14 concentration value of the gas species,  $X_i$ :

$$15 \quad \theta_{s,X_i} = [X_i]_s / [X_i]_{s,max} = \sigma_{X_i} [X_i]_s \quad (17)$$

16 The adsorbed molecule can thermally desorb back to the gas phase.

17 Desorption can be described by a first-order rate coefficient,  $k_{d,X_i}$ , which is assumed to be  
 18 independent of  $\theta_{s,X_i}$ . The flux of desorption of gas-phase molecules can be expressed as

$$19 \quad J_{des,X_i} = k_{d,X_i} [X_i]_s = \tau_{d,X_i}^{-1} [X_i]_s \quad (18)$$

20 The desorption lifetime  $\tau_{d,X_i}$  is the mean residence time on the surface in the absence of  
 21 surface reaction and surface bulk transport. For  $NO_3$  we assume to have two desorption  
 22 lifetimes,  $\tau_{d,NO_3,1}$  and  $\tau_{d,NO_3,2}$ , which are combined to give an effective desorption time  $\tau_{d,NO_3,eff}$   
 23 weighted by the organic surface coverage,  $\theta_{ss} = [Y]_{ss} / [Y]_{ss,0}$  as

$$24 \quad \tau_{d,NO_3,eff}^{-1} = \theta_{ss} \tau_{d,NO_3,1}^{-1} + (1 - \theta_{ss}) \tau_{d,NO_3,2}^{-1} \quad (19)$$

25 This change in desorption time is related to the change of orientation of the organic molecules  
 26 at the interface, *i.e.* for a highly packed monolayer the reactive site is assumed to be less  
 27 accessible, and the oxidant has less affinity for other parts of the molecules hence the  
 28 desorption is faster. When the organic surface coverage decreases the reactive sites become  
 29 more accessible and the desorption is slowed down. For  $NO_2$  we considered a single

1 desorption lifetime,  $\tau_{d,NO_2}$ . Once adsorbed to the surface, the gas-phase molecules can be  
 2 transported to the bulk water and vice versa. The corresponding fluxes can be expressed as

$$3 \quad J_{sb, X_i} = k_{sb, X_i} [X_i]_s \quad (20)$$

$$4 \quad J_{bs, X_i} = k_{bs, X_i} [X_i]_b \quad (21)$$

5 where  $k_{bs, X_i}$  in  $\text{cm s}^{-1}$  is a transport coefficient and can be regarded as effective transport  
 6 velocity. The bulk diffusion coefficient,  $D_{b, X_i}$ , can be used to estimate this transport velocity,  
 7  $k_{bs, X_i} \approx 4D_{b, X_i} / \pi \lambda_{X_i}$  where  $\lambda_{X_i}$  is the average travel distance from the near-surface bulk into  
 8 the sorption layer. To estimate  $k_{sb, X_i}$  the rate coefficients for gas–surface and surface–bulk  
 9 transport can be matched with a literature value or estimate for the Henry's law coefficient or  
 10 gas–particle equilibrium partitioning coefficient ( $H_{X_i}$ ):

11

$$12 \quad k_{sb, X_i} = \frac{4k_{bs, X_i} H_{X_i}}{\alpha_{s, X_i} \tau_{d, X_i} \omega_{X_i}} \quad (22)$$

## 13 **4.2 Fitting: choice of free and fixed parameters**

14 The kinetic model depends on several parameters, and some of them are strongly correlated.  
 15 For example, for a given gas species time evolution, which may be described by certain  
 16 accommodation coefficients ( $\alpha_{s,0, X_i}$  where  $X_i$  is  $\text{NO}_3$  or  $\text{NO}_2$ ) and certain desorption lifetimes  
 17 ( $\tau_{d, X_i}$ ), a good fit may be obtained as well with a lower  $\alpha_{s,0, X_i}$  and an higher  $\tau_{d, X_i}$ . The  
 18 accommodation coefficient represents the probability of the gas-phase molecule to absorb at  
 19 the organic layer, hence the lower  $\alpha_{s,0, \text{NO}_3}$  is, the smaller is the probability of the reaction with  
 20 the organic molecule. The desorption lifetime represents the mean residence time of the  
 21 molecule absorbed at the surface, hence the longer the time is, the higher is the probability for  
 22 the gas molecule to react (valid for  $\text{NO}_3$ ).  $\text{NO}_2$  does not react with the organic layer,<sup>12</sup> but  
 23 those parameters still compensate, because  $\alpha_{s,0, \text{NO}_2}$  determines the number of molecules  
 24 absorbed and  $\tau_{d, \text{NO}_2}$  determines the number of molecules leaving the sorption sites. The choice  
 25 of leaving both of these parameters free to vary in the fitting will lead to a wide range of  
 26 values for both. The resulting surface excess will match the experimental data. However, the  
 27 choice of fixing one out of these two parameters makes the optimisation of the model  
 28 computationally easier and the comparison between different organic molecules possible.

29

## 30 **4.3 Fitting Results**

### 31 **4.3.1 dOA exposed to $\text{NO}_3$**

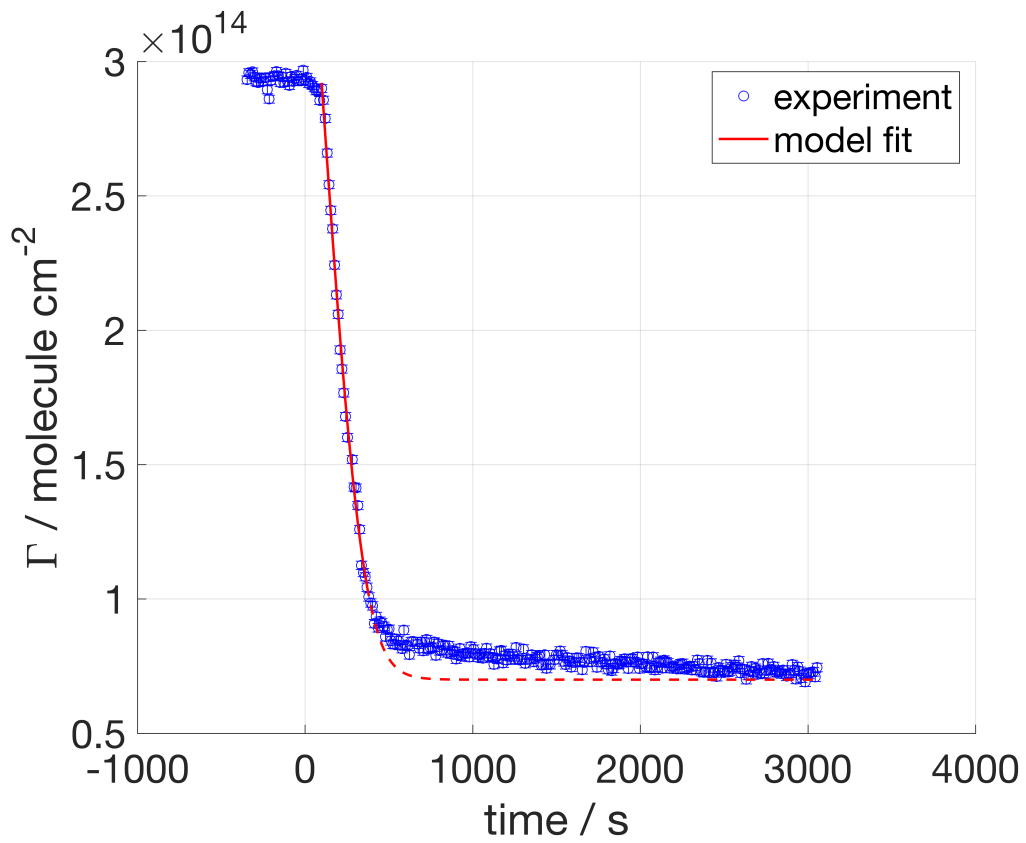

1  
2 **Figure 17.** dOA exposed to 86 ppt  $\text{NO}_3$ .  
3

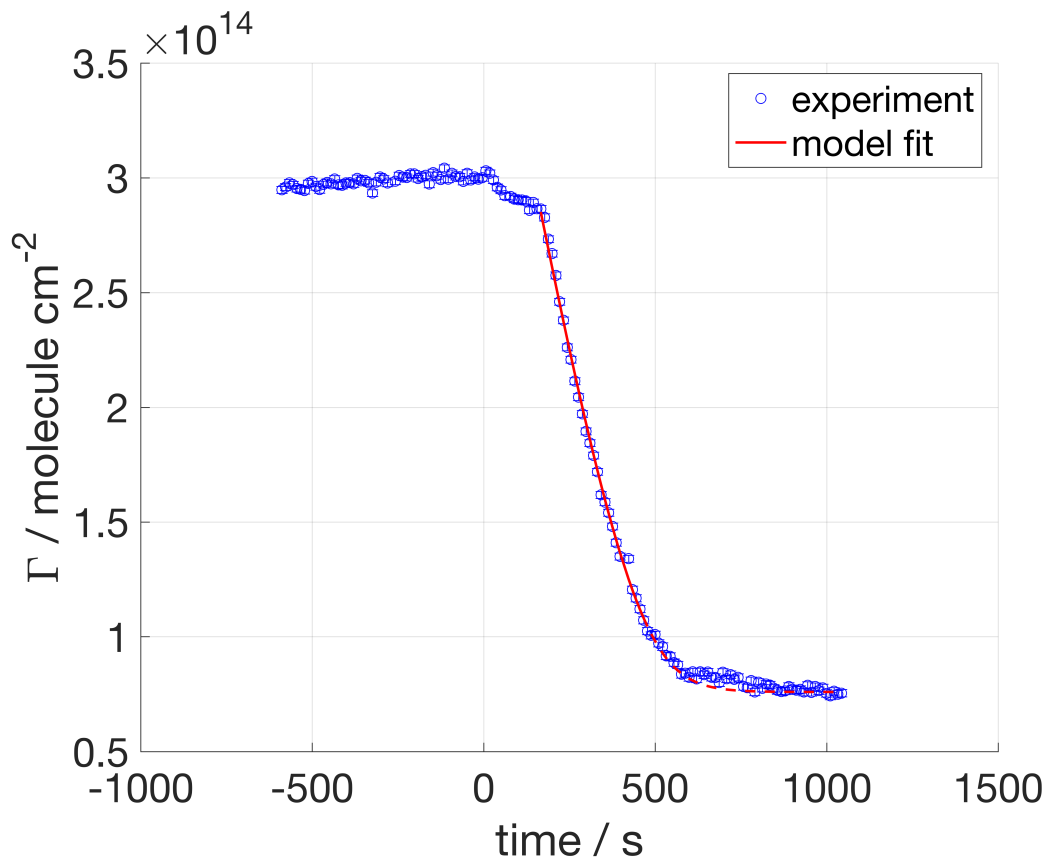

4  
5 **Figure 18.** dOA exposed to 86 ppt  $\text{NO}_3$ .  
6

1  
2

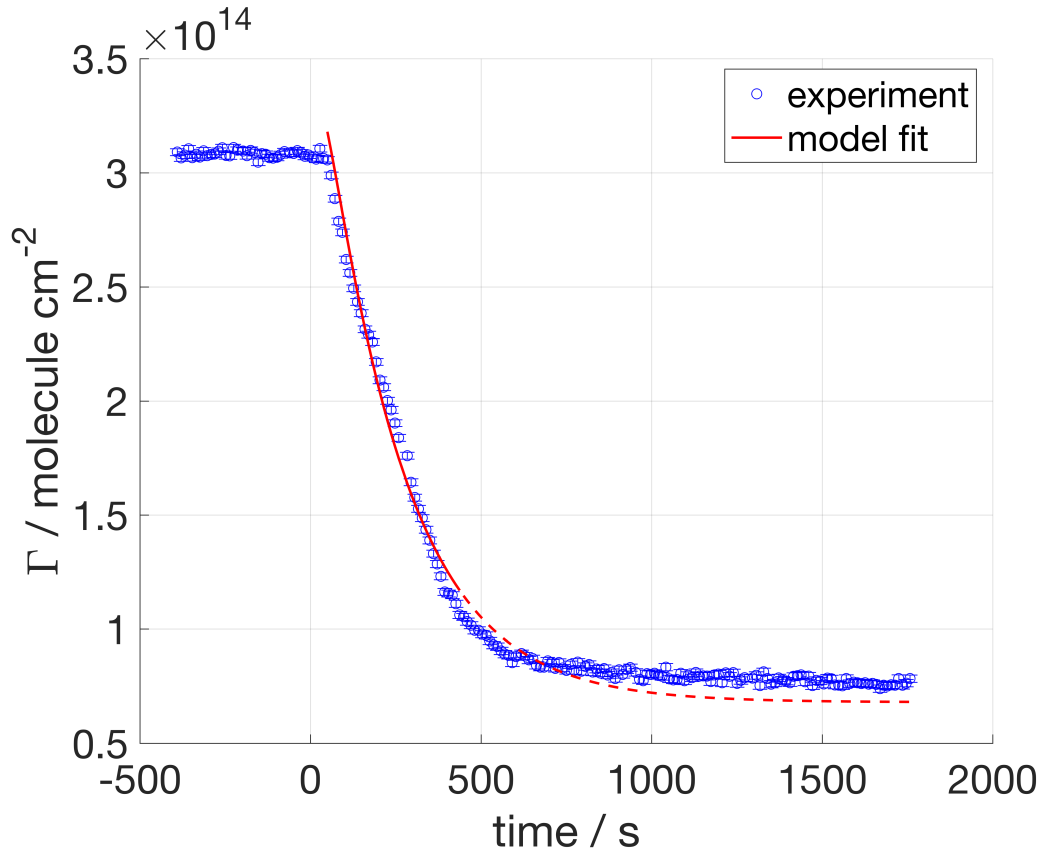

3  
4 **Figure 19.** dOA exposed to 35 ppt  $\text{NO}_3$ .

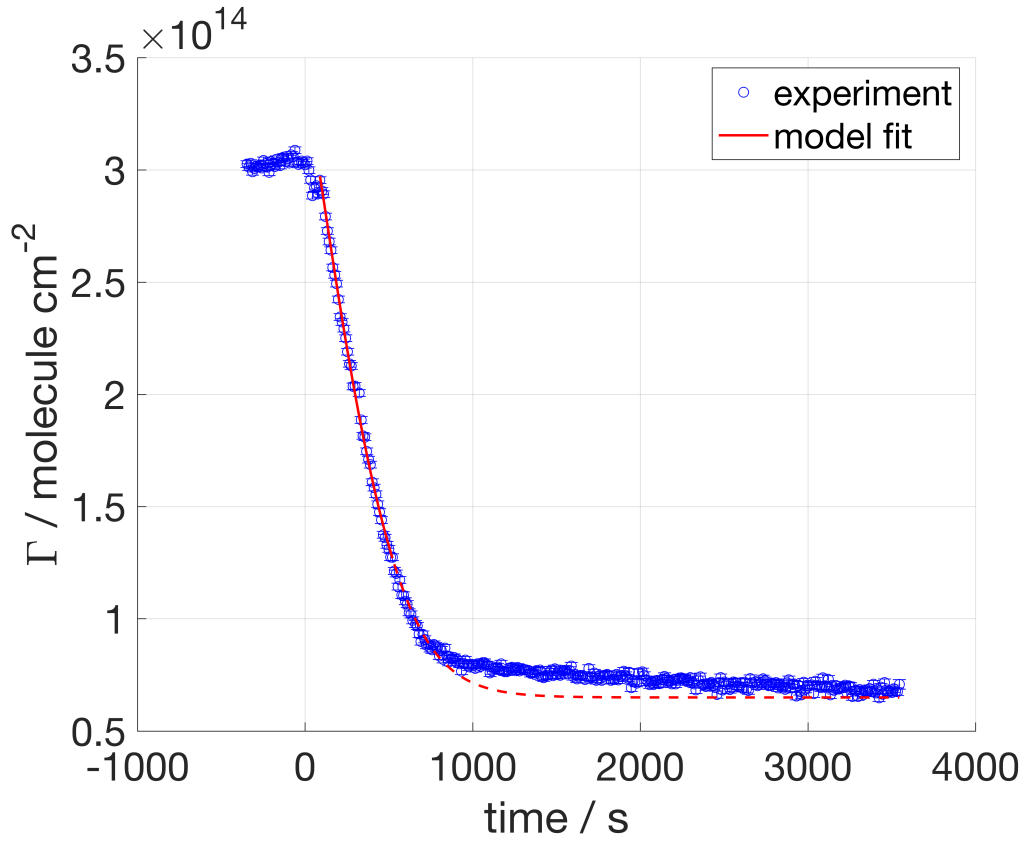

5  
6 **Figure 20.** dOA exposed to 36 ppt  $\text{NO}_3$ .

1

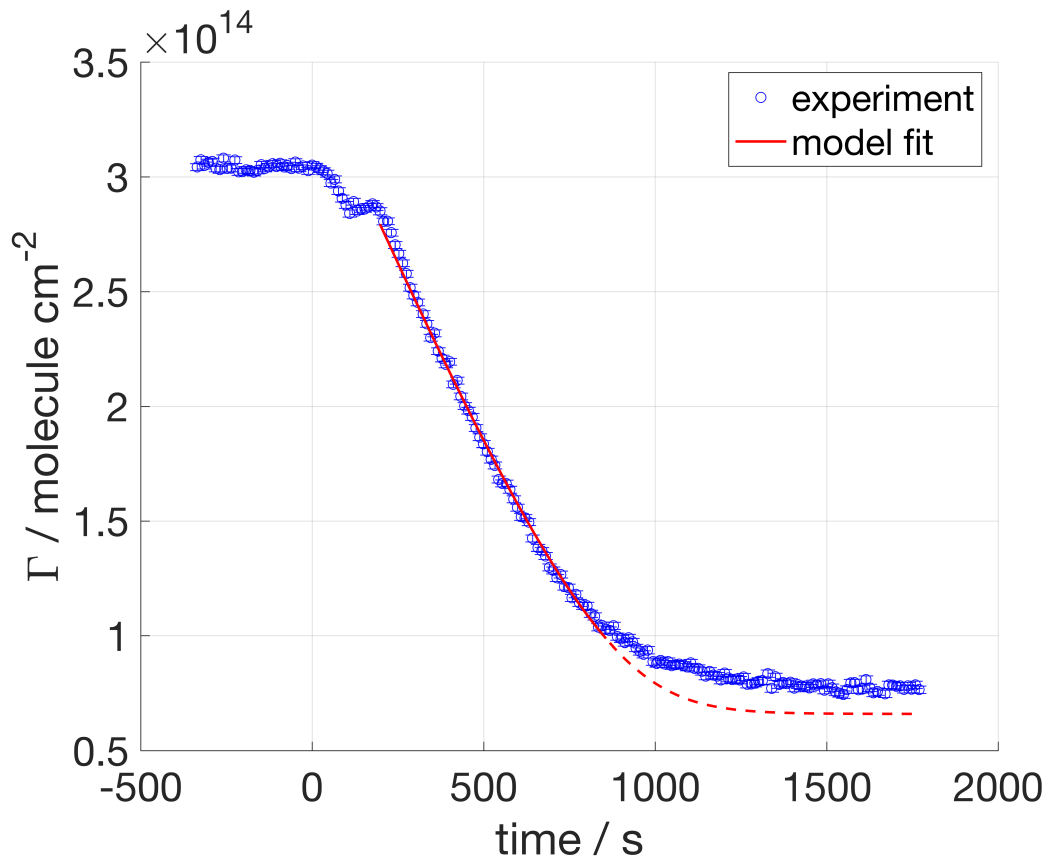

2  
3  
4

**Figure 21.** dOA exposed to 36 ppt  $\text{NO}_3$ .

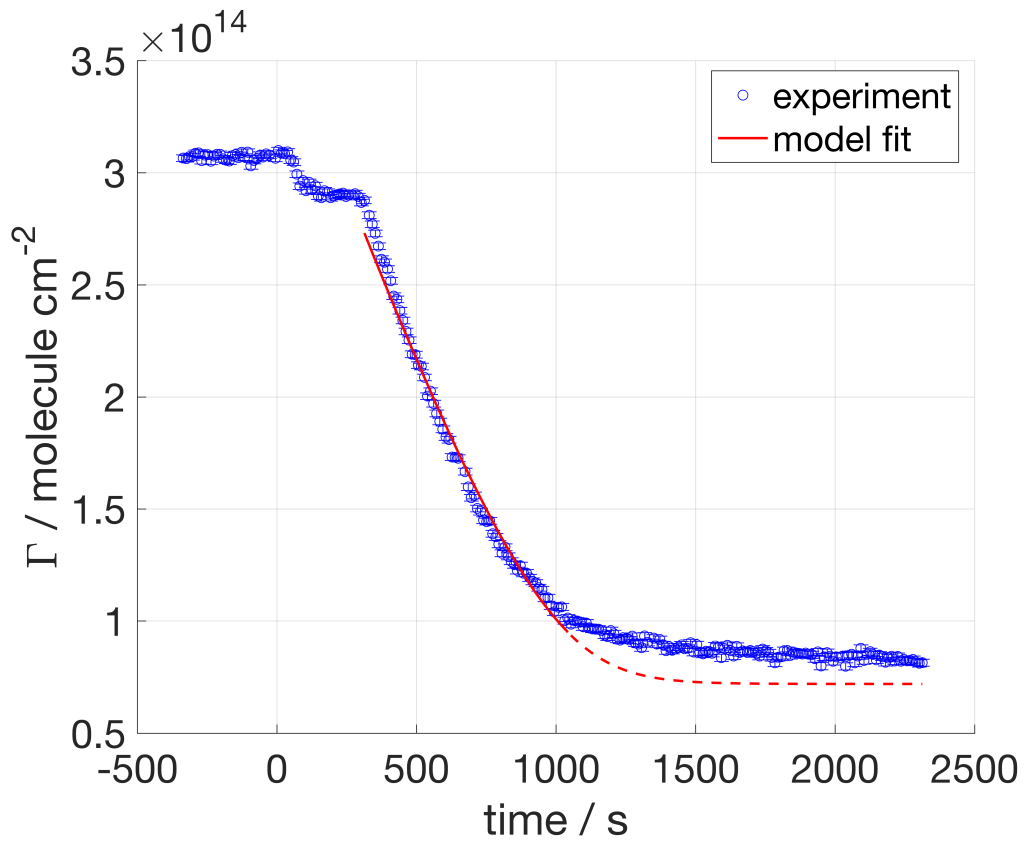

5  
6

**Figure 22.** dOA exposed to 32 ppt  $\text{NO}_3$ .

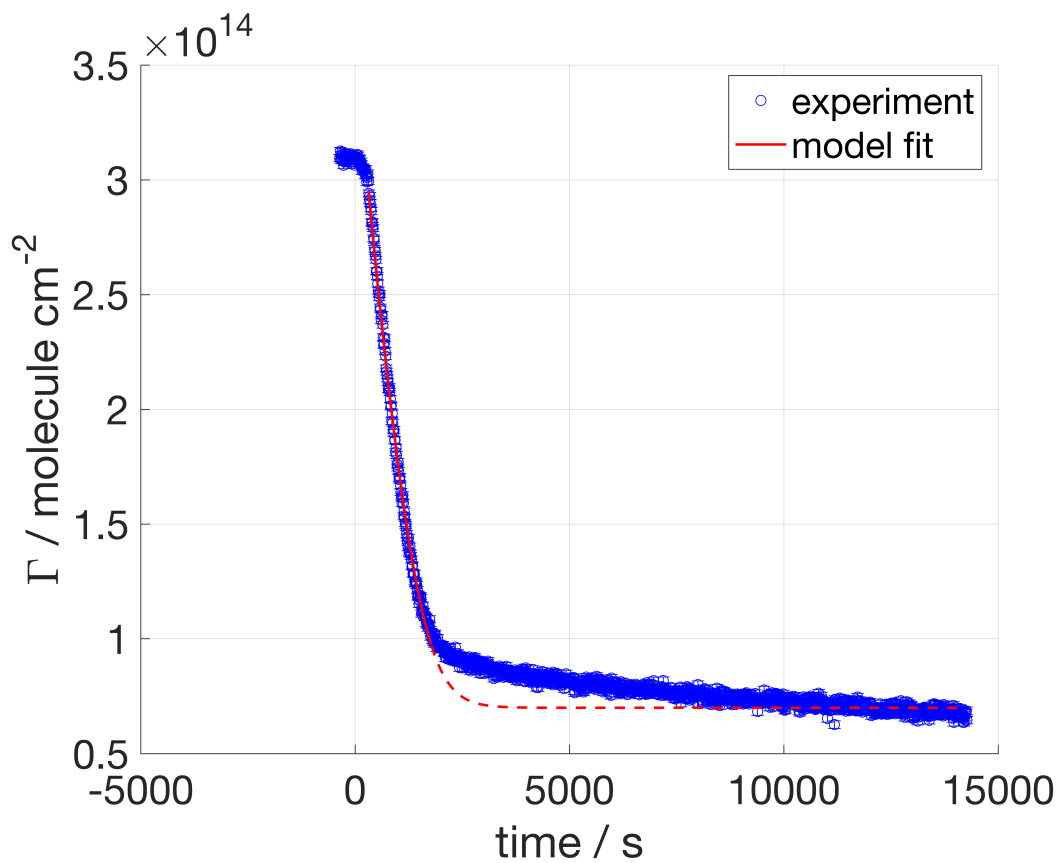

1  
2 **Figure 23.** dOA exposed to 15 ppt  $\text{NO}_3$ .  
3

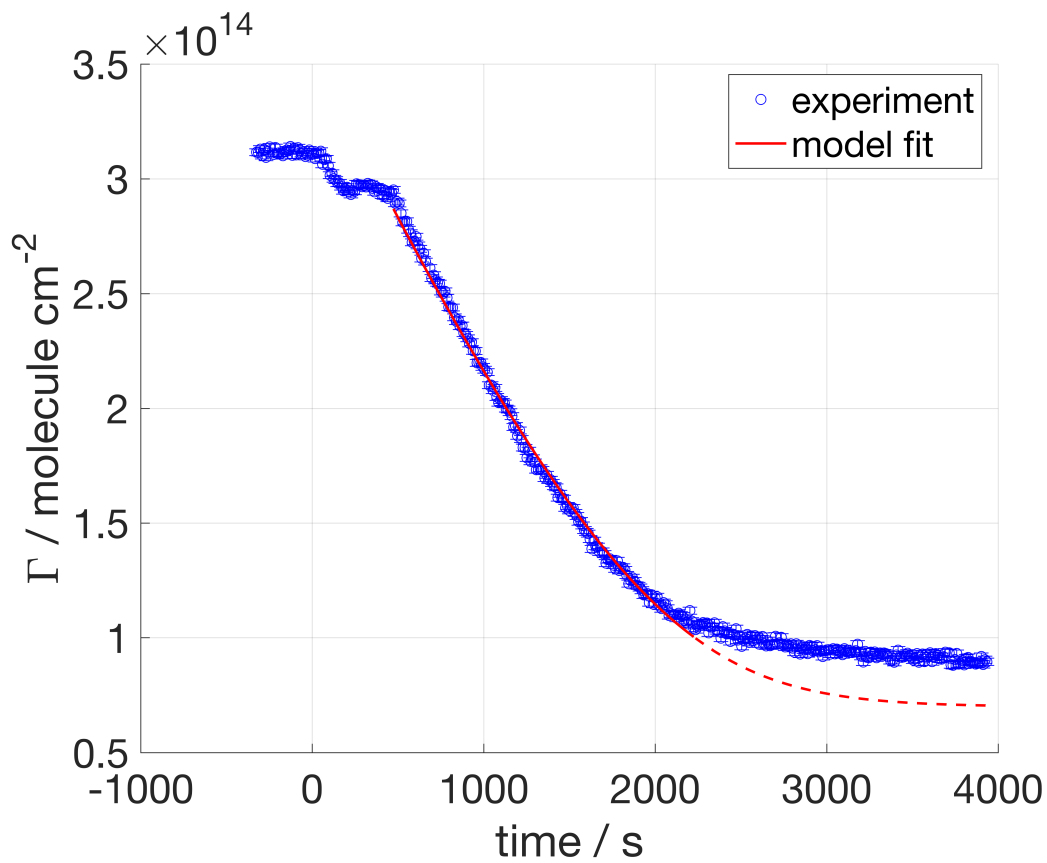

4  
5 **Figure 24.** dOA exposed to 15 ppt  $\text{NO}_3$ .

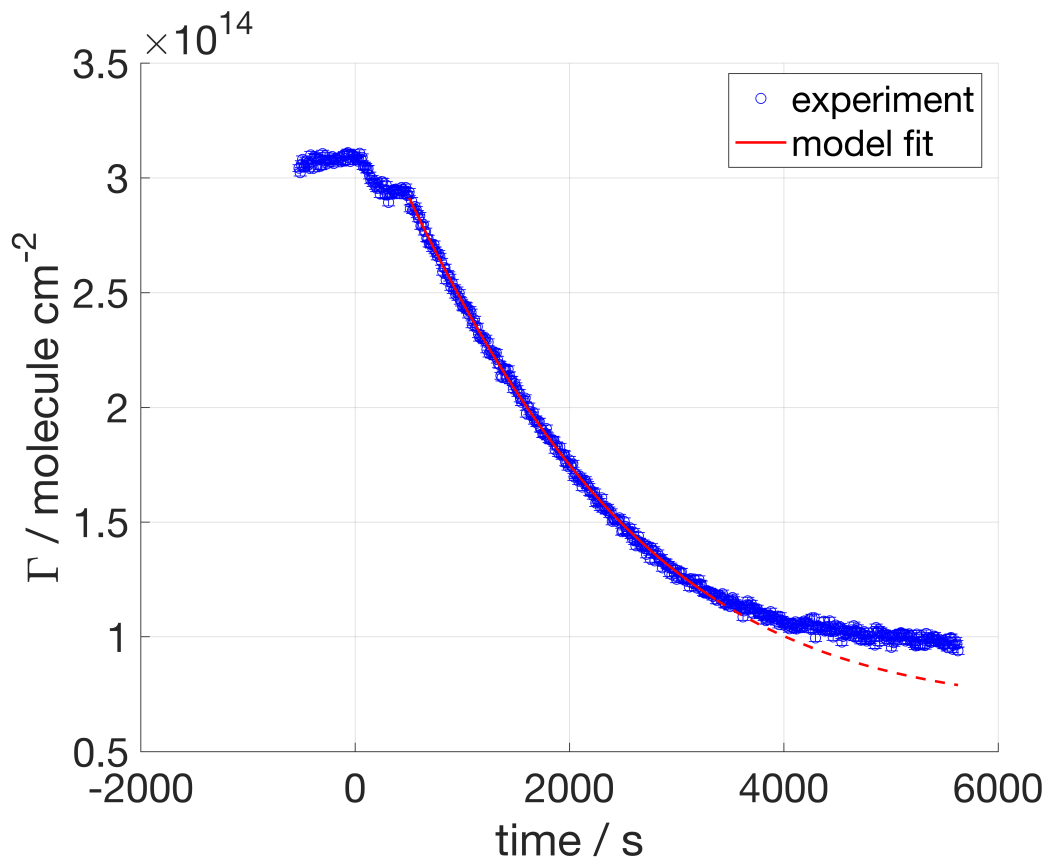

1  
2 **Figure 25.** dOA exposed to 13 ppt  $\text{NO}_3$ .  
3

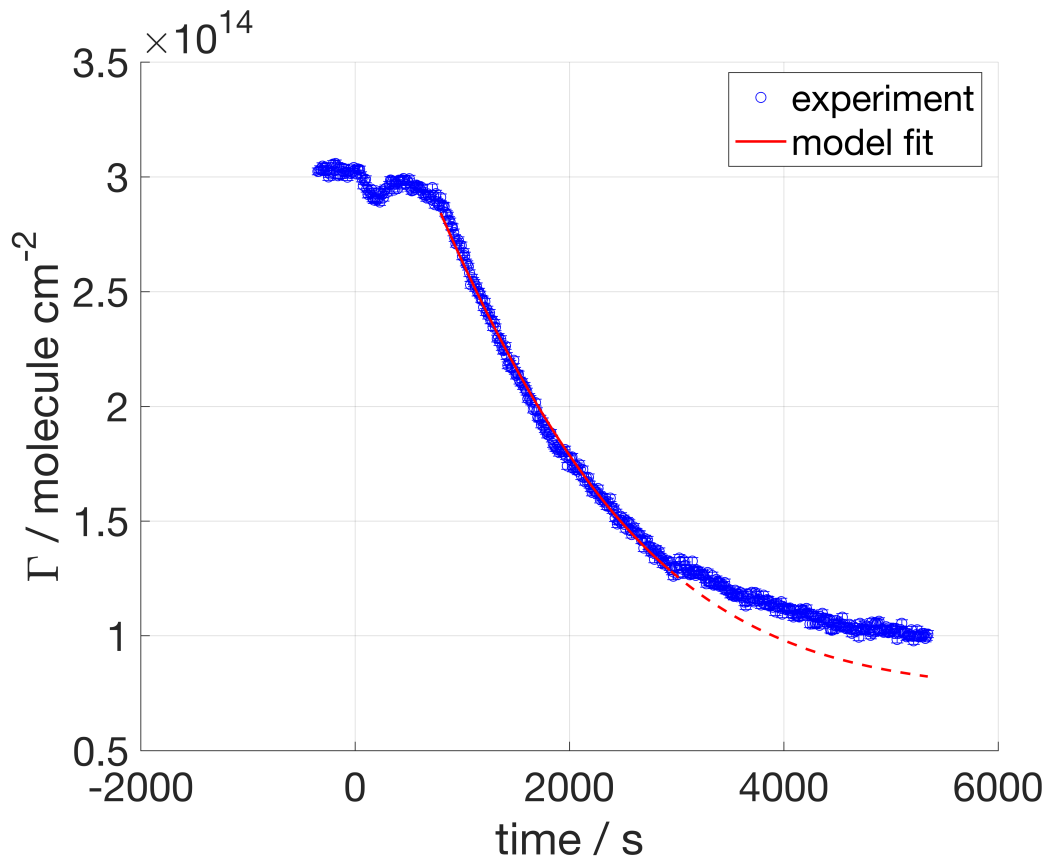

4  
5 **Figure 26.** dOA exposed to 13 ppt  $\text{NO}_3$ .



1

2 **4.3.2 dPOA exposed to NO<sub>3</sub>**

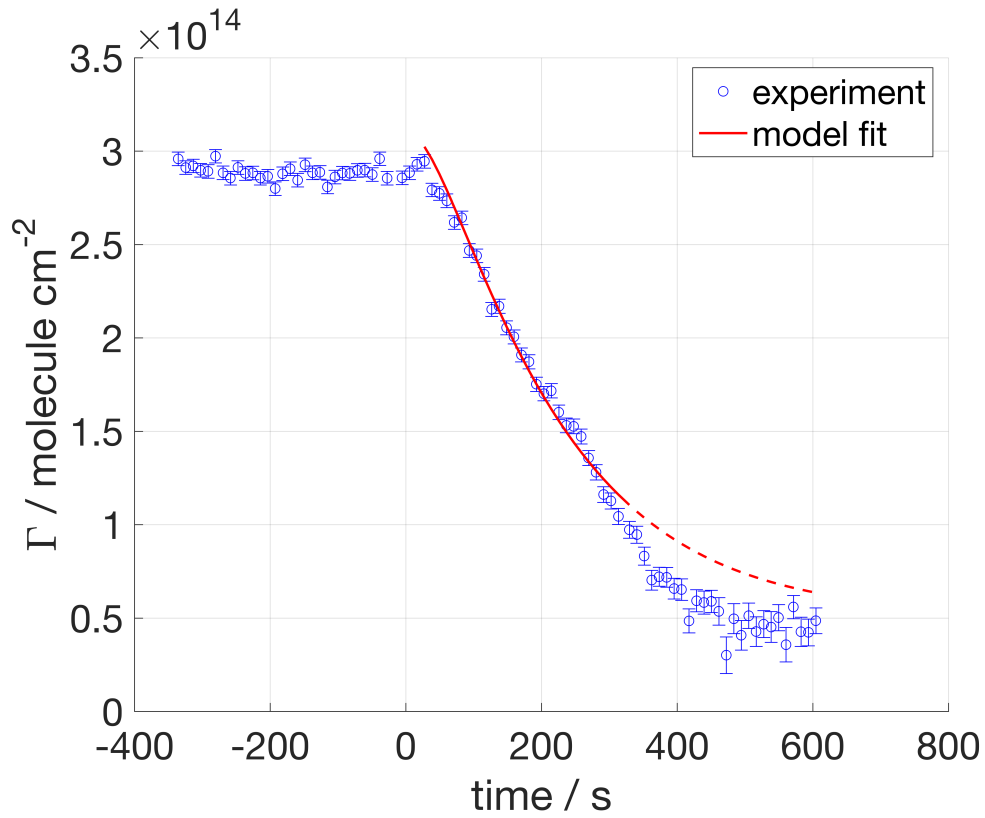

3

4 **Figure 27.** dPOA exposed to 86 ppt NO<sub>3</sub>.

5

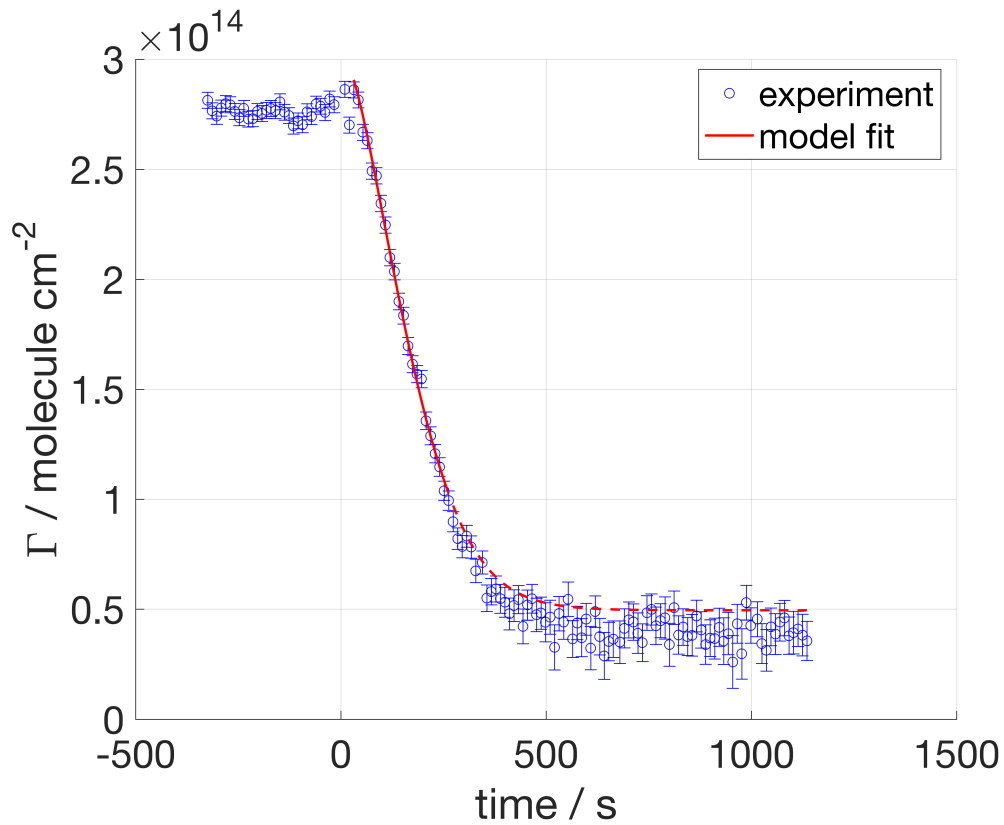

6

7 **Figure 28.** dPOA exposed to 86 ppt NO<sub>3</sub>.

1

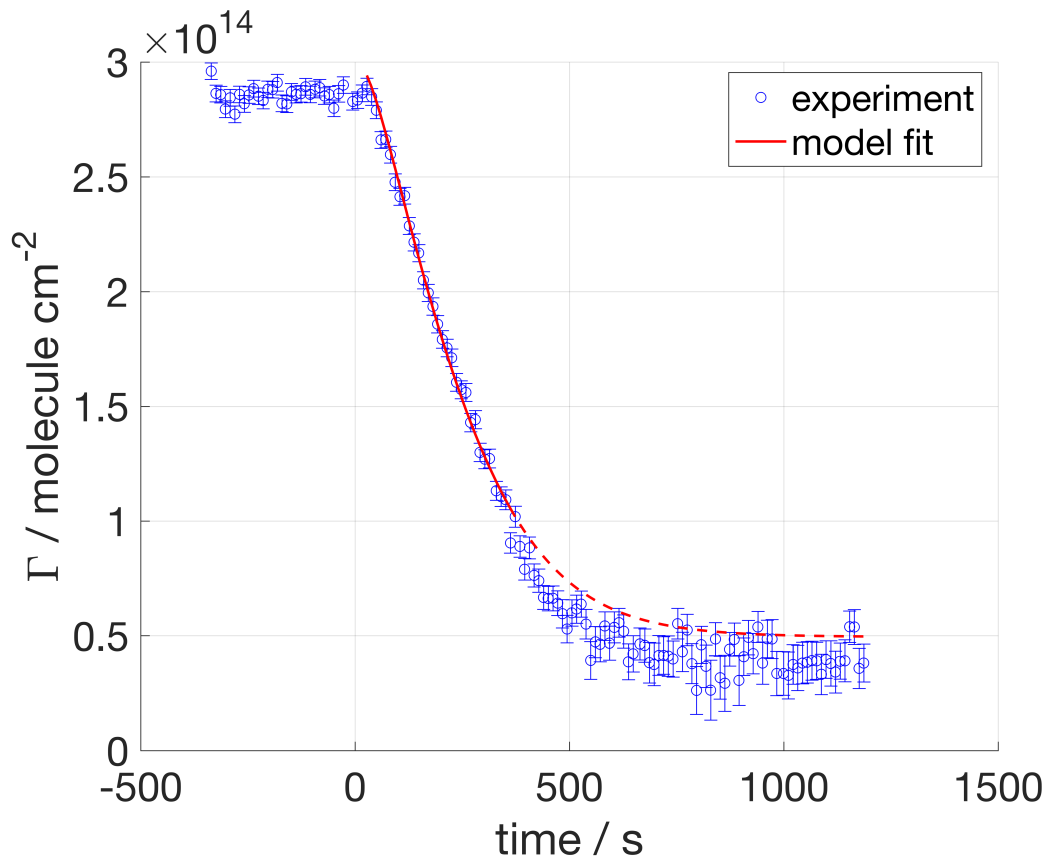

2  
3

**Figure 29.** dPOA exposed to 35 ppt  $\text{NO}_3$ .

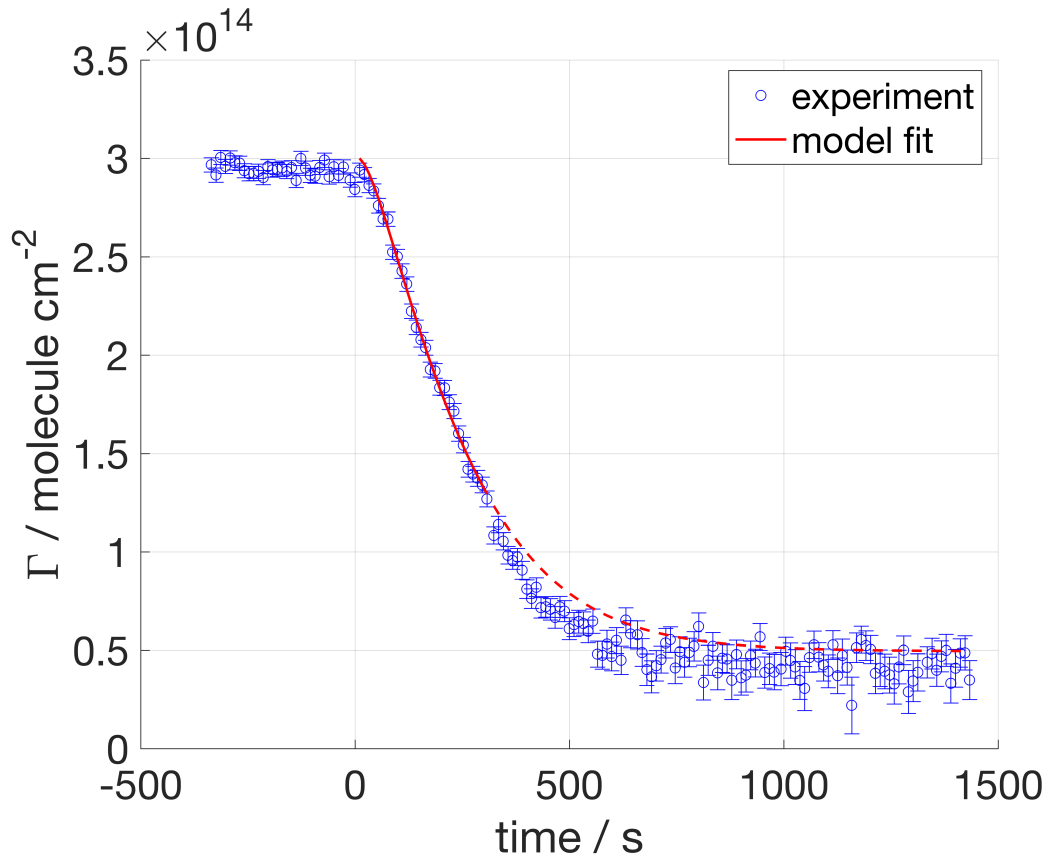

4  
5

**Figure 30.** dPOA exposed to 36 ppt  $\text{NO}_3$ .

1

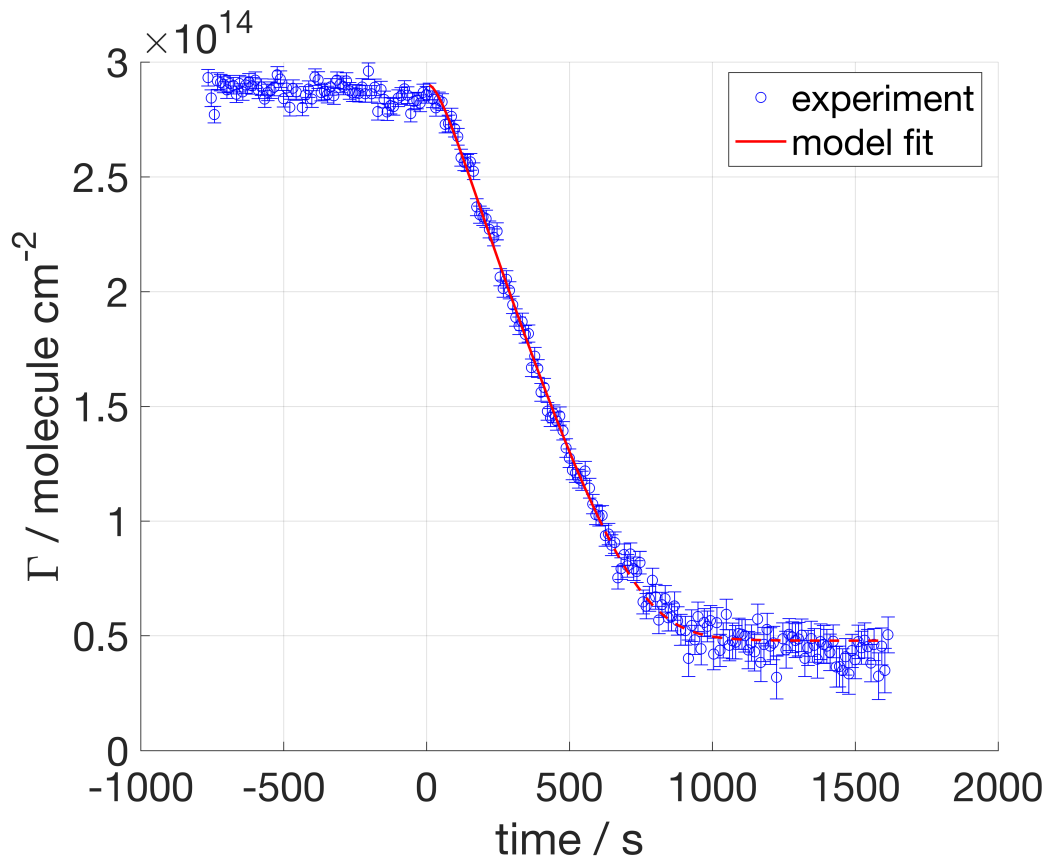

2  
3

**Figure 31.** dPOA exposed to 32 ppt  $\text{NO}_3$ .

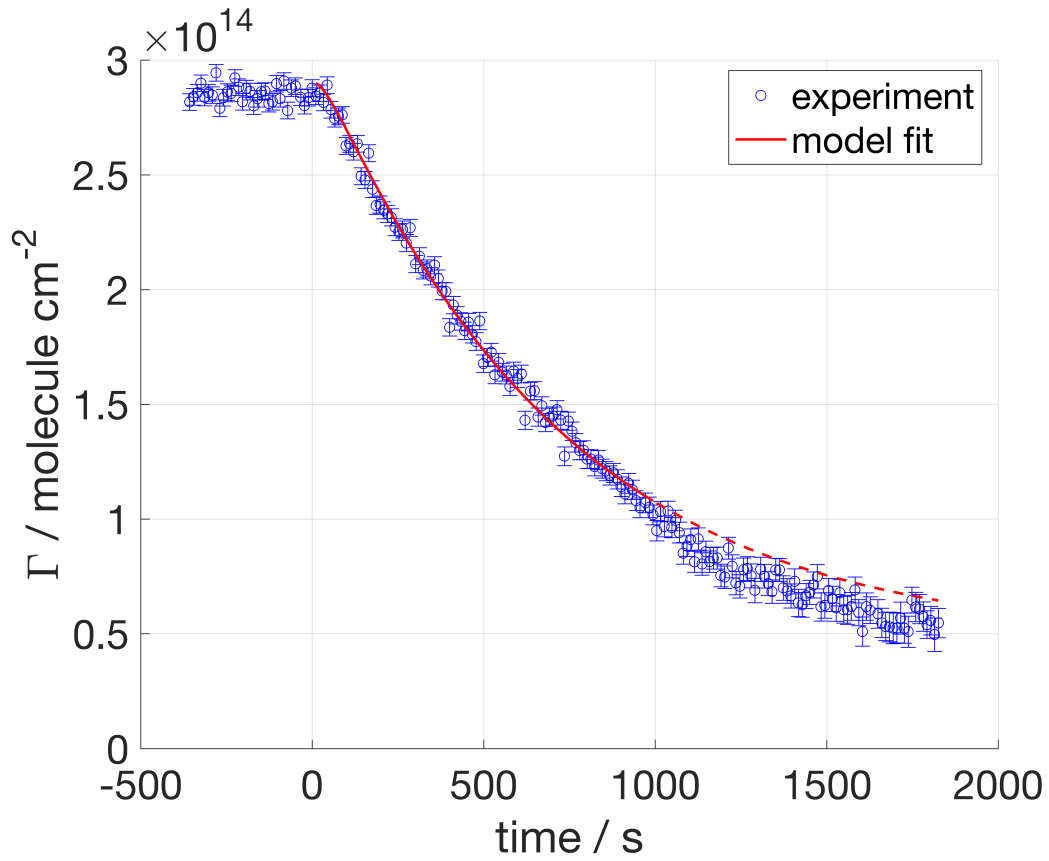

4  
5

**Figure 32.** dPOA exposed to 15 ppt  $\text{NO}_3$ .

1

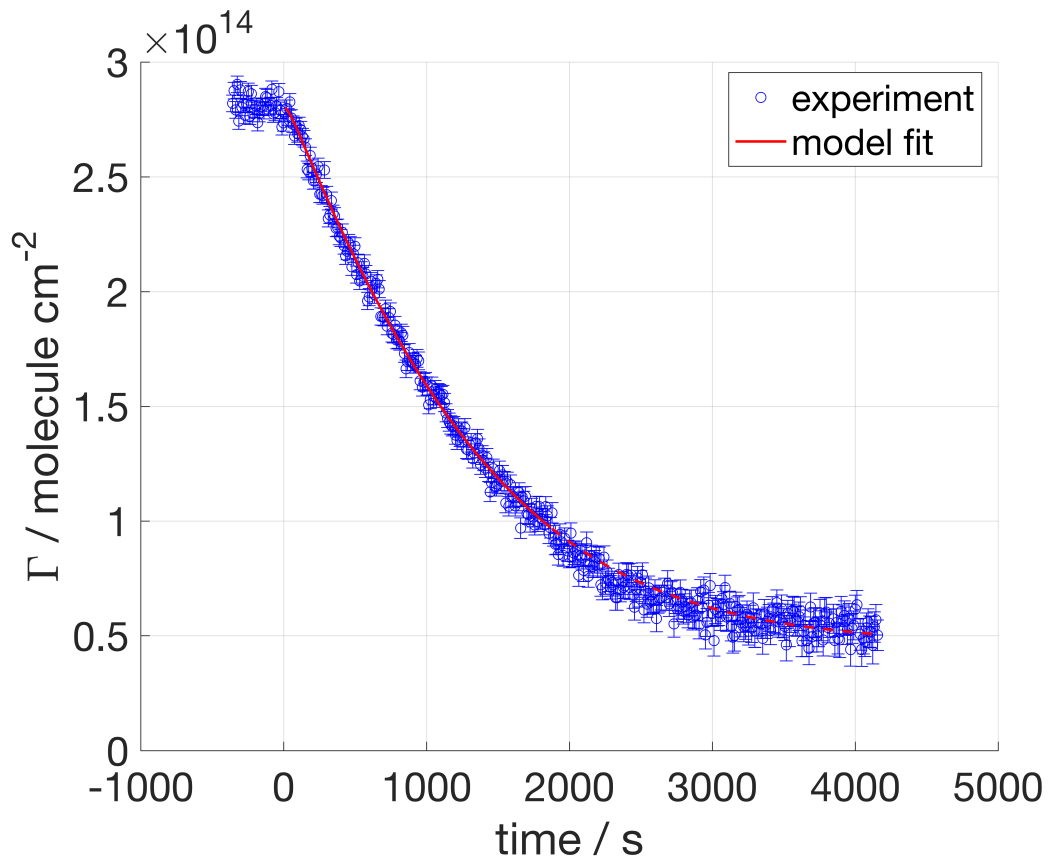

2

3 **Figure 33.** dPOA exposed to 13 ppt  $\text{NO}_3$ .

4

5

#### 4.3.3 dMO exposed to $\text{NO}_3$

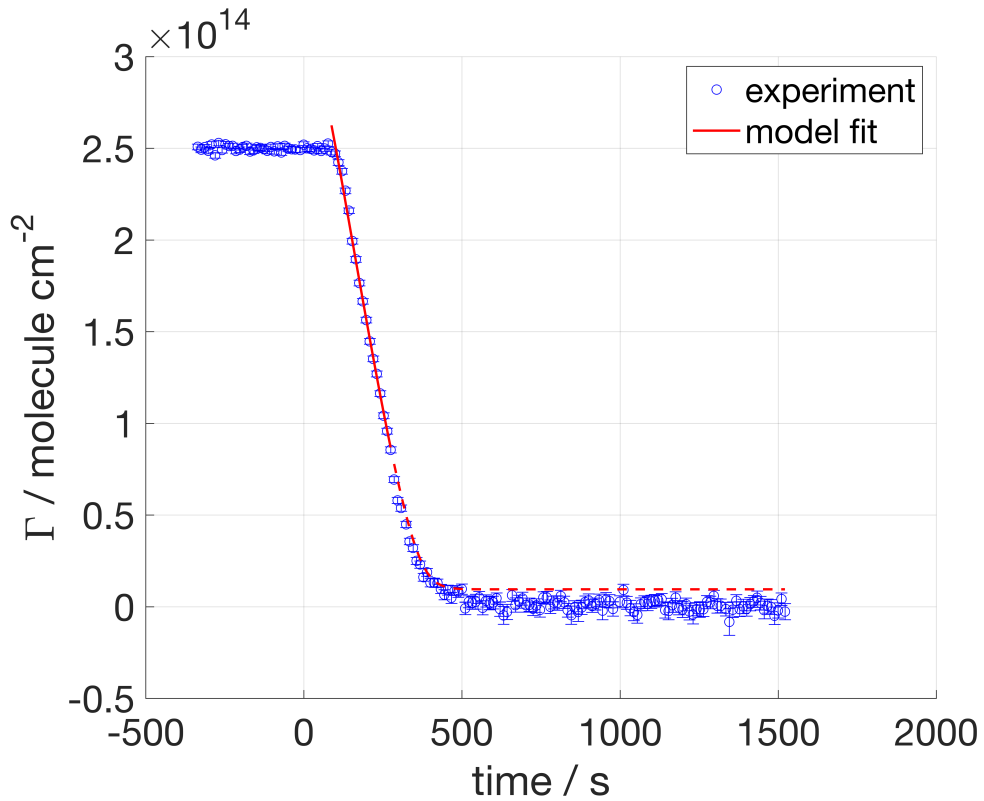

6

7

**Figure 34.** dMO exposed to 86 ppt  $\text{NO}_3$ .

1

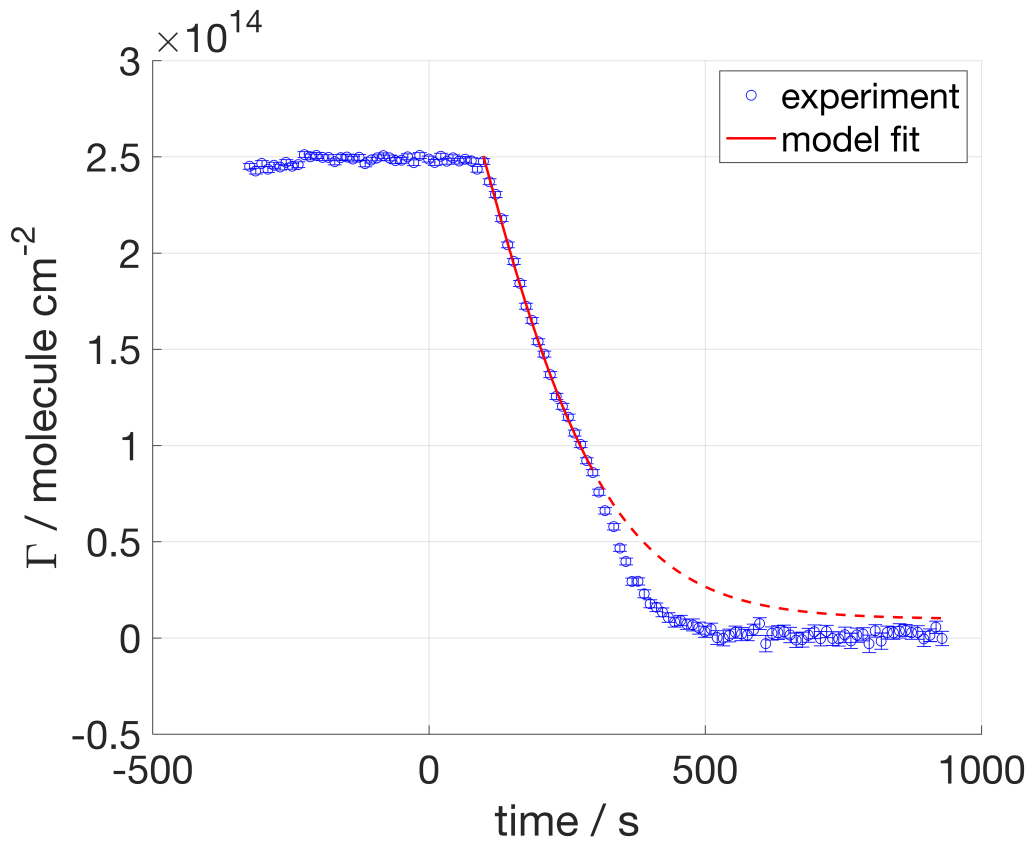

2

3

Figure 35. dMO exposed to 86 ppt  $\text{NO}_3$ .

4

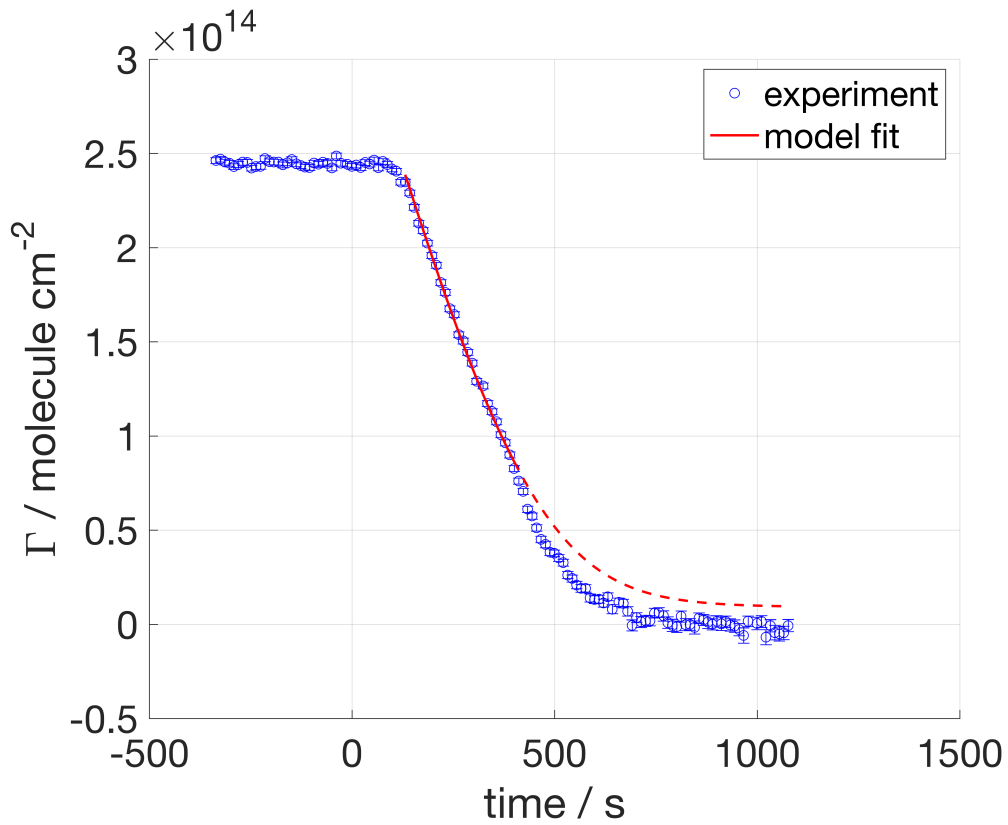

5

6

Figure 36. dMO exposed to 36 ppt  $\text{NO}_3$ .

7

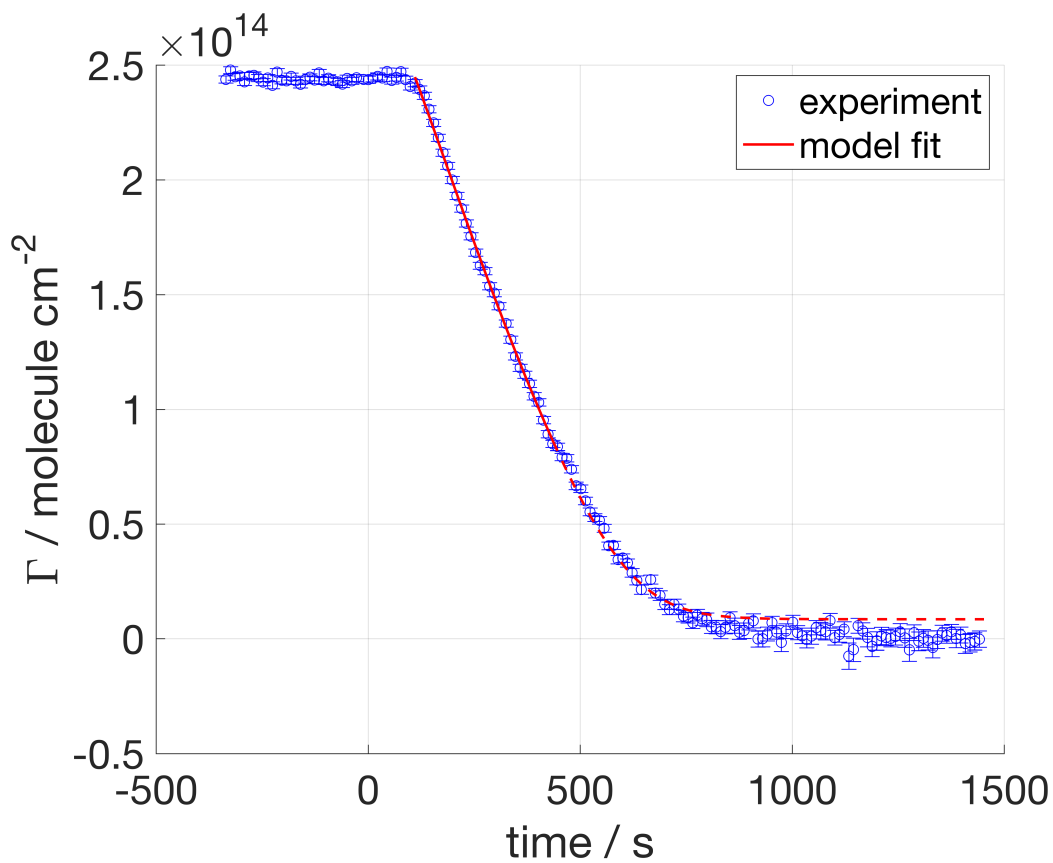

1  
2 **Figure 37.** dMO exposed to 36 ppt  $\text{NO}_3$ .  
3

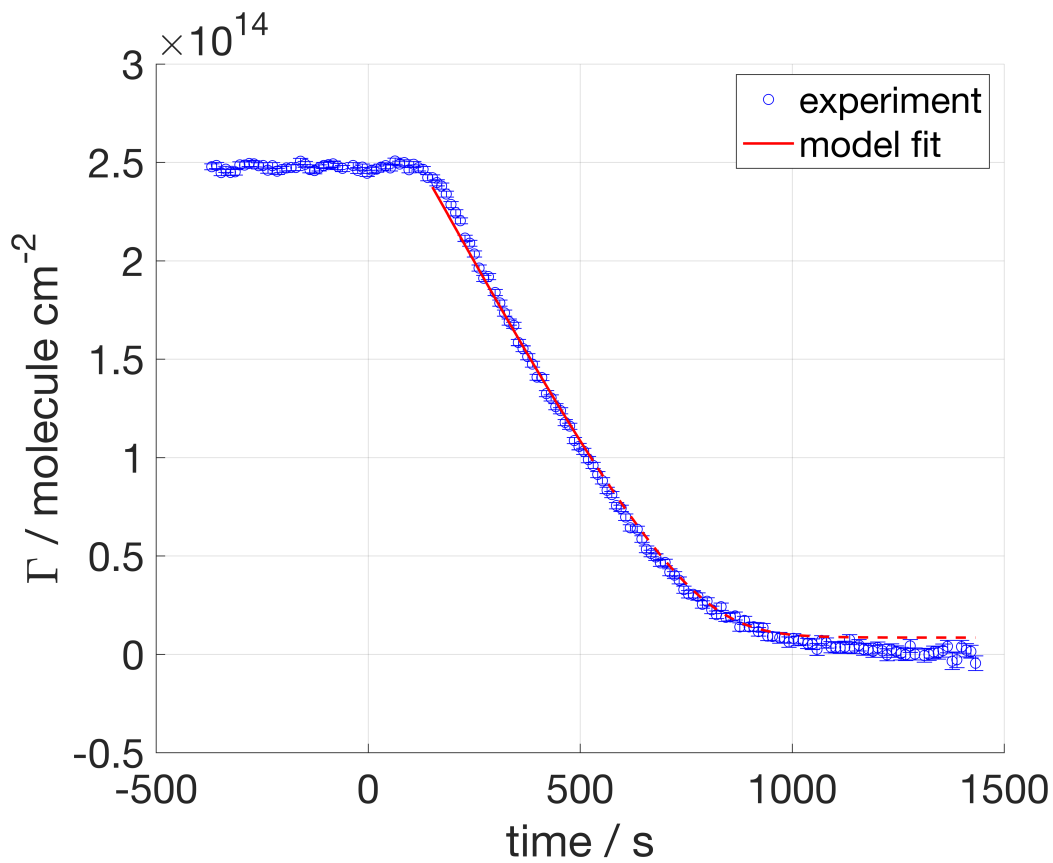

4  
5 **Figure 38.** dMO exposed to 32 ppt  $\text{NO}_3$ .

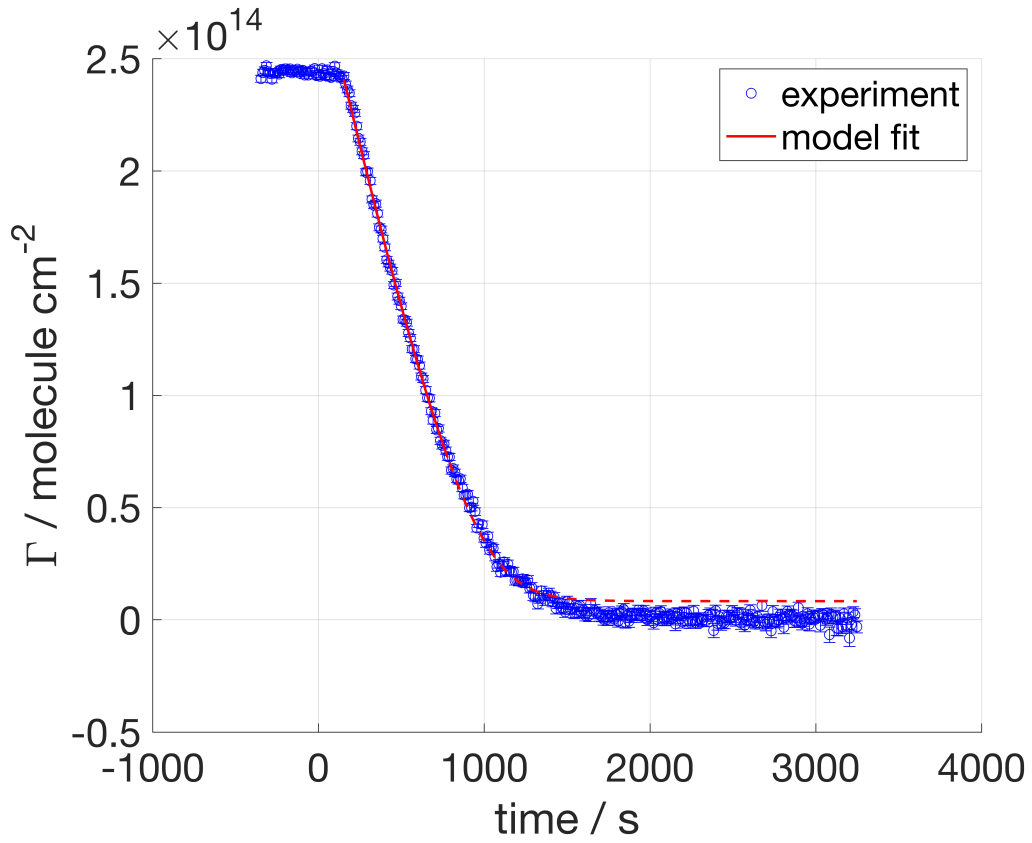

1  
2 **Figure 39.** dMO exposed to 15 ppt  $\text{NO}_3$ .

3  
4

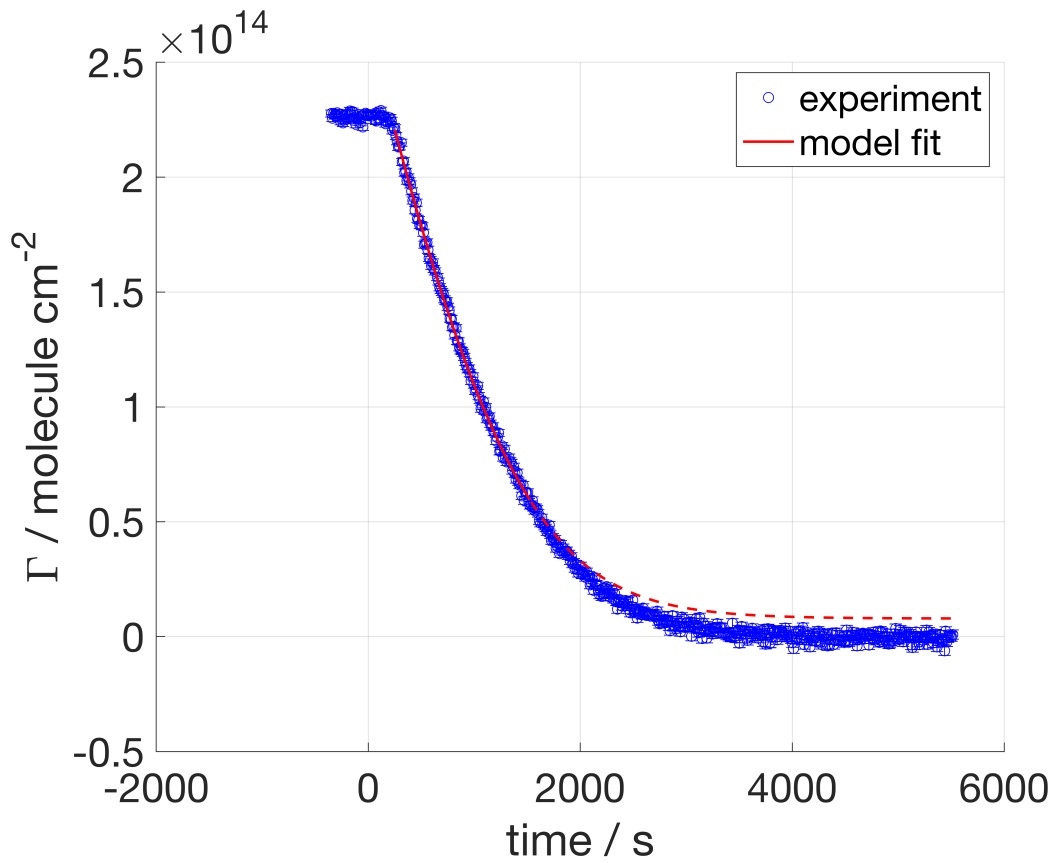

5  
6 **Figure 40.** dMO exposed to 13 ppt  $\text{NO}_3$ .

1  
2  
3  
4  
5  
6  
7  
8  
9  
10  
11  
12  
13  
14  
15  
16  
17  
18  
19  
20  
21  
22  
23  
24  
25  
26  
27  
28  
29  
30  
31

## References

1. Barnes, G. & Gentle, I. *Interfacial science: an introduction*. (Oxford University Press, 2010).
2. Sander, S. P. *et al.* Chemical Kinetics and Photochemical Data for Use in Atmospheric Studies, Evaluation No. 17. *JPL Publ. 10-6* (2011).
3. Seinfeld, J. H. & Pandis, S. N. *Atmospheric Chemistry and Physics: From Air Pollution to Climate Change*. (John Wiley & Sons, Inc., 2006).
4. Troe, J. Specific rate constant  $k(E, J)$  for unimolecular bond fission. *J. Chem. Phys.* **79**, 6017–6029 (1983).
5. MATLAB. *version 7.12.0 (R2011a)*. (The Math Works Inc., 2011).
6. Guttman, A. Absolute infrared intensity measurements on nitrogen dioxide and dinitrogen tetroxide. *J. Quant. Spectrosc. Radiat. Transf.* **2**, 1–15 (1961).
7. Cantrell, C. A., Davidson, J. A., McDaniel, A. H., Shetter, R. E. & Calvert, J. G. Infrared absorption cross sections for  $N_2O_5$ . *Chem. Phys. Lett.* **148**, 358–363 (1988).
8. Hjorth, J., Ottobriani, G., Cappellani, F. & Restelli, G. A Fourier transform infrared study of the rate constant of the homogeneous gas-phase reaction nitrogen oxide ( $N_2O_5$ ) + water and determination of absolute infrared band intensities of  $N_2O_5$  and nitric acid. *J. Phys. Chem.* **91**, 1565–1568 (1987).
9. Chackerian, C., Sharpe, S. W. & Blake, T. A. Anhydrous nitric acid integrated absorption cross sections: 820-5300  $cm^{-1}$ . *J. Quant. Spectrosc. Radiat. Transf.* **82**, 429–441 (2003).
10. Ammann, M. *et al.* Evaluated kinetic and photochemical data for atmospheric chemistry: Volume VI - heterogeneous reactions with liquid substrates. *Atmos. Chem. Phys.* **13**, 8045–8228 (2013).
11. Brown, S. S. & Stutz, J. Nighttime radical observations and chemistry. *Chem. Soc. Rev.* **41**, 6405–6447 (2012).
12. King, M. D., Rennie, A. R., Pfrang, C., Hughes, A. V & Thompson, K. C. Interaction of nitrogen dioxide ( $NO_2$ ) with a monolayer of oleic acid at the air–water interface – A simple proxy for atmospheric aerosol. *Atmos. Environ.* **44**, 1822–1825 (2010).
